# Supplementary material for: Synthesis, structure and reactivity of iridium complexes containing a bis-cyclometalated tridentate C^N^C ligand
Source: Royal Society of Chemistry journal article supplement (doi:10.1039/d1dt01269j), 2021-01-01
Supplement: d1dt01269j1.pdf [file d1dt01269j1.pdf]

## Supplementary Information for

# **Synthesis, structure and reactivity of iridium(III) complexes containing a bis-cyclometalated tridentate C<sup>N</sup>C ligand**

Wai-Man Cheung,<sup>a</sup> Man-Chun Chong,<sup>a</sup> Herman H.-Y. Sung,<sup>a</sup> Shun-Cheung Cheng,<sup>b</sup>

Ian D. Williams,<sup>\*a</sup> Chi-Chiu Ko<sup>\*b</sup> and Wa-Hung Leung<sup>\*a</sup>

<sup>a</sup>Department of Chemistry, The Hong Kong University of Science and Technology, Clear Water Bay, Kowloon, China. E-mail: [chwill@ust.hk](mailto:chwill@ust.hk), [chleung@ust.hk](mailto:chleung@ust.hk).

<sup>b</sup>Department of Chemistry, City University of Hong Kong, Tat Chee Avenue, Kowloon, Hong Kong, China. E-mail: [vinceko@cityu.edu.hk](mailto:vinceko@cityu.edu.hk)

## Table of Content

|                                                           |       |
|-----------------------------------------------------------|-------|
| 1. Crystallographic data and experimental details         | p. 3  |
| 2. UV-visible absorption and emission spectra             | p. 4  |
| 3. FT-IR (KBr) spectra                                    | p. 11 |
| 4. Cyclic voltammograms                                   | p. 17 |
| 5. NMR spectra                                            | p. 21 |
| 6. Preliminary x-ray structure of <b>7</b>                | p. 34 |
| 7. Molecular structures, selected bond lengths and angles | p.35  |
| 8. Mass spectrum of the oxidation product of <b>8</b>     | p.45  |

**Table S1.** Crystallographic data and experimental details for **2, 3, 4, 5, 8, 8', 9** and **10**.

|                                                                                                       | <b>2</b>                                                                                                | <b>3</b>                                                            | <b>4</b>                                                                                        | <b>5</b>                                                 | <b>8</b>                                           | <b>8'</b>                                                                         | <b>9</b>                                                          | <b>10</b>                                                                                                 |
|-------------------------------------------------------------------------------------------------------|---------------------------------------------------------------------------------------------------------|---------------------------------------------------------------------|-------------------------------------------------------------------------------------------------|----------------------------------------------------------|----------------------------------------------------|-----------------------------------------------------------------------------------|-------------------------------------------------------------------|-----------------------------------------------------------------------------------------------------------|
| Formula                                                                                               | C <sub>42</sub> H <sub>54</sub> Cl <sub>5</sub> HgIr <sub>2</sub> N<br>·CH <sub>2</sub> Cl <sub>2</sub> | C <sub>41</sub> H <sub>51</sub> Cl <sub>2</sub> HgIr <sub>2</sub> N | C <sub>33</sub> H <sub>39</sub> ClHgIrN<br>·(CH <sub>2</sub> Cl <sub>2</sub> ) <sub>1.375</sub> | C <sub>33</sub> H <sub>39</sub> ClIrN·CH <sub>3</sub> OH | C <sub>51</sub> H <sub>55</sub> IrN <sub>2</sub> O | C <sub>51</sub> H <sub>55</sub> IrN <sub>2</sub> O·C <sub>6</sub> H <sub>14</sub> | C <sub>58</sub> H <sub>63</sub> IrN <sub>2</sub> O <sub>4</sub> S | C <sub>54</sub> H <sub>43</sub> ClIrP <sub>3</sub> ·(C<br>H <sub>2</sub> Cl <sub>2</sub> ) <sub>0.5</sub> |
| Formula weight                                                                                        | 1335.10                                                                                                 | 1213.71                                                             | 1026.98                                                                                         | 709.34                                                   | 904.17                                             | 990.34                                                                            | 1076.36                                                           | 1054.90                                                                                                   |
| Crystal system                                                                                        | triclinic                                                                                               | triclinic                                                           | monoclinic                                                                                      | triclinic                                                | monoclinic                                         | monoclinic                                                                        | triclinic                                                         | triclinic                                                                                                 |
| Space group                                                                                           | P-1                                                                                                     | P-1                                                                 | P2 <sub>1</sub> /n                                                                              | P-1                                                      | P2 <sub>1</sub> /c                                 | P2 <sub>1</sub> /c                                                                | P-1                                                               | P-1                                                                                                       |
| <i>a</i> , Å                                                                                          | 11.4169(5)                                                                                              | 10.6104(4)                                                          | 21.7337(2)                                                                                      | 12.0649(4)                                               | 11.78531(10)                                       | 14.19411(12)                                                                      | 10.3452(4)                                                        | 10.7955(5)                                                                                                |
| <i>b</i> , Å                                                                                          | 11.6904(5)                                                                                              | 12.0252(5)                                                          | 11.72515(11)                                                                                    | 12.2041(5)                                               | 12.98197(13)                                       | 13.27153(11)                                                                      | 15.7451(6)                                                        | 12.1139(4)                                                                                                |
| <i>c</i> , Å                                                                                          | 16.8087(7)                                                                                              | 16.6227(8)                                                          | 29.5201(3)                                                                                      | 12.5489(6)                                               | 28.0763(2)                                         | 26.6663(2)                                                                        | 16.1341(6)                                                        | 18.5808(6)                                                                                                |
| <i>α</i> , deg                                                                                        | 70.906(4)                                                                                               | 69.278(4)                                                           | 90                                                                                              | 118.782(5)                                               | 90                                                 | 90                                                                                | 94.912(3)                                                         | 76.851(3)                                                                                                 |
| <i>β</i> , deg                                                                                        | 79.811(3)                                                                                               | 72.867(4)                                                           | 104.7030(11)                                                                                    | 105.993(4)                                               | 91.5588(8)                                         | 92.5650(8)                                                                        | 99.262(3)                                                         | 88.011(3)                                                                                                 |
| <i>γ</i> , deg                                                                                        | 88.663(3)                                                                                               | 83.902(3)                                                           | 90                                                                                              | 100.339(3)                                               | 90                                                 | 90                                                                                | 105.162(3)                                                        | 69.189(4)                                                                                                 |
| <i>V</i> , Å <sup>3</sup>                                                                             | 2085.12(16)                                                                                             | 1895.69(15)                                                         | 7276.30(13)                                                                                     | 1445.99(12)                                              | 4293.99(7)                                         | 5018.30(7)                                                                        | 2480.87(17)                                                       | 2208.99(15)                                                                                               |
| <i>Z</i>                                                                                              | 2                                                                                                       | 2                                                                   | 8                                                                                               | 2                                                        | 4                                                  | 4                                                                                 | 2                                                                 | 2                                                                                                         |
| <i>ρ</i> <sub>calc</sub> , g cm <sup>-3</sup>                                                         | 2.126                                                                                                   | 2.126                                                               | 1.875                                                                                           | 1.629                                                    | 1.399                                              | 1.311                                                                             | 1.441                                                             | 1.586                                                                                                     |
| <i>T</i> , K                                                                                          | 100.01(10)                                                                                              | 173.00(10)                                                          | 100.00(10)                                                                                      | 100.00(10)                                               | 173.00(10)                                         | 173.00(10)                                                                        | 173.00(10)                                                        | 118(20)                                                                                                   |
| <i>μ</i> , mm <sup>-1</sup>                                                                           | 21.753                                                                                                  | 21.942                                                              | 17.162                                                                                          | 9.986                                                    | 6.304                                              | 5.438                                                                             | 5.981                                                             | 8.280                                                                                                     |
| <i>F</i> (000)                                                                                        | 1264.0                                                                                                  | 1144.0                                                              | 3956.0                                                                                          | 712.0                                                    | 1840.0                                             | 2040.0                                                                            | 1100.0                                                            | 1054.0                                                                                                    |
| Total reflections                                                                                     | 11532                                                                                                   | 10545                                                               | 39147                                                                                           | 8101                                                     | 16314                                              | 31708                                                                             | 16355                                                             | 12789                                                                                                     |
| Independent reflections                                                                               | 7357                                                                                                    | 7056                                                                | 13080                                                                                           | 5132                                                     | 8191                                               | 10304                                                                             | 10011                                                             | 8465                                                                                                      |
| <i>R</i> <sub>int</sub>                                                                               | 0.0255                                                                                                  | 0.0245                                                              | 0.0326                                                                                          | 0.0220                                                   | 0.0250                                             | 0.0229                                                                            | 0.0287                                                            | 0.0274                                                                                                    |
| GoF <sup>a</sup>                                                                                      | 1.046                                                                                                   | 1.011                                                               | 1.039                                                                                           | 1.011                                                    | 1.020                                              | 1.035                                                                             | 1.035                                                             | 1.026                                                                                                     |
| <i>R</i> <sub>1</sub> , <sup>b</sup> <i>wR</i> <sub>2</sub> <sup>c</sup> [ <i>I</i> > 2σ( <i>I</i> )] | 0.0340, 0.0860                                                                                          | 0.0245, 0.0625                                                      | 0.0334, 0.0805                                                                                  | 0.0207, 0.0521                                           | 0.0233, 0.0546                                     | 0.0210, 0.0514                                                                    | 0.0257, 0.0620                                                    | 0.0299, 0.0758                                                                                            |
| <i>R</i> <sub>1</sub> , <i>wR</i> <sub>2</sub> (all data)                                             | 0.0361, 0.0876                                                                                          | 0.0262, 0.0637                                                      | 0.0394, 0.0830                                                                                  | 0.0216, 0.0526                                           | 0.0267, 0.0565                                     | 0.0233, 0.0530                                                                    | 0.0280, 0.0638                                                    | 0.0325, 0.0775                                                                                            |

$$^a \text{GoF} = [\sum w(|F_o| - |F_c|)^2 / (N_{\text{obs}} - N_{\text{param}})]^{1/2}. \quad ^b R_1 = \sum ||F_o| - |F_c|| / \sum |F_o|. \quad ^c wR_2 = [(\sum w|F_o| - |F_c|)^2 / \sum w^2 |F|$$

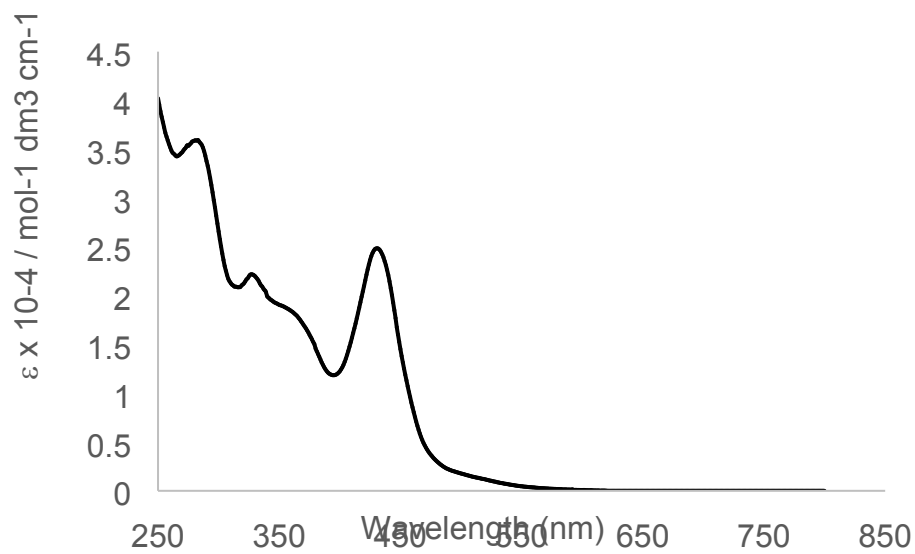

**Figure S1.** UV-visible spectrum of  $[\text{Cl}(\kappa^2\text{-HC}^{\text{N}}\text{C})(\text{cod})\text{IrHgIr}(\text{cod})\text{Cl}_2]_2$  (**2**) in  $\text{CH}_2\text{Cl}_2$  at room temperature.

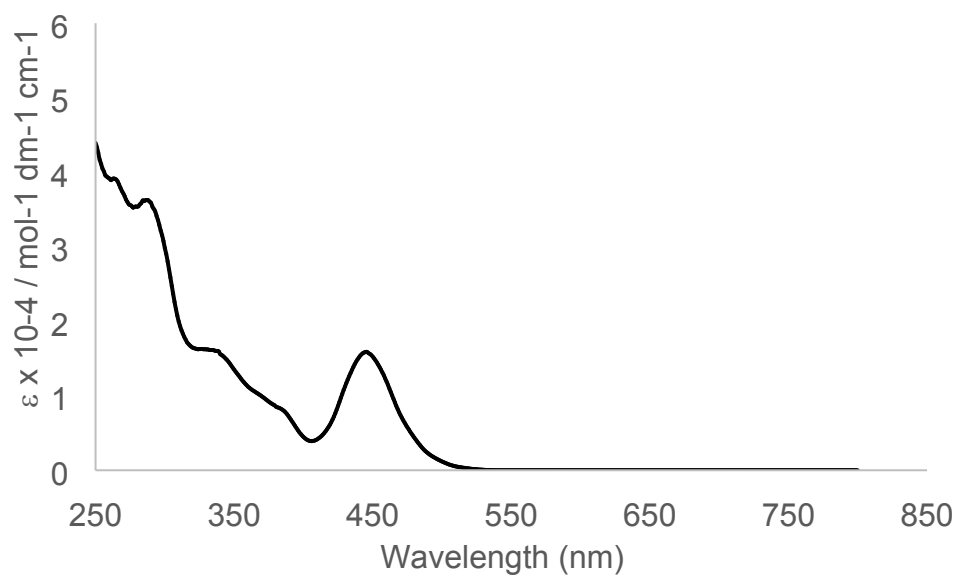

**Figure S2.** UV-visible spectrum of  $[(\text{C}^{\text{N}}\text{C})(\text{cod})\text{IrHgIr}(\text{cod})\text{Cl}_2]$  (**3**) in  $\text{CH}_2\text{Cl}_2$  at room temperature.

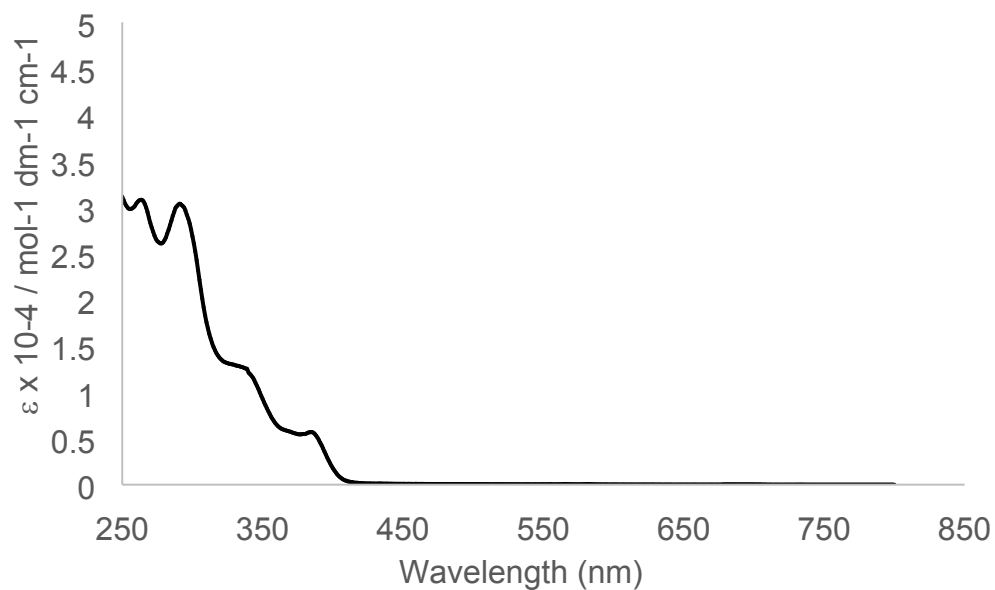

**Figure S3.** UV-visible spectrum of  $[\text{Ir}(\text{C}^{\wedge}\text{N}^{\wedge}\text{C})(\text{cod})(\text{HgCl})]$  (**4**) in  $\text{CH}_2\text{Cl}_2$  at room temperature.

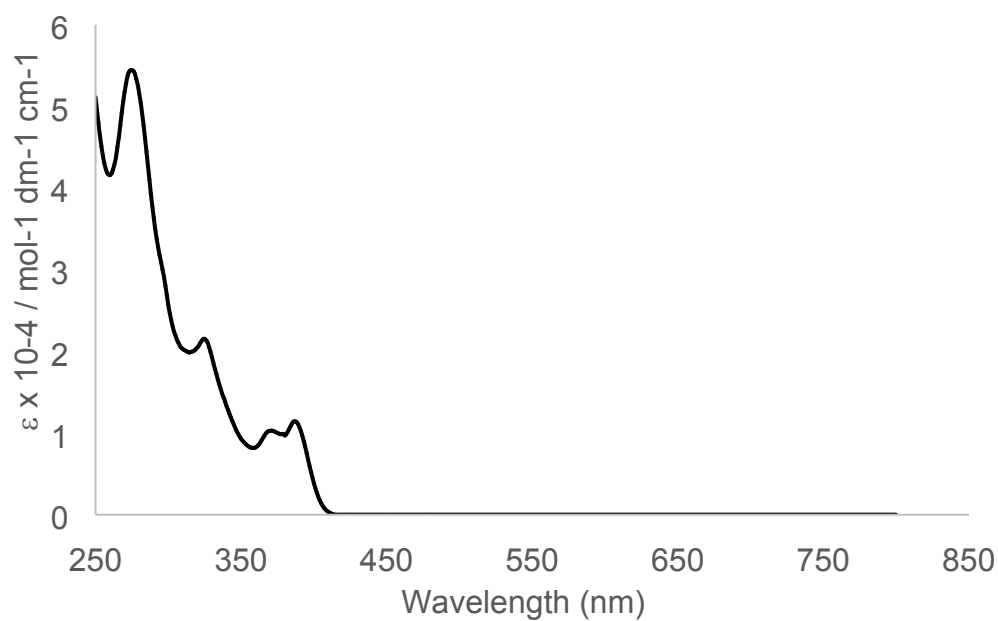

**Figure S4.** UV-visible spectrum of  $[\text{Ir}(\text{C}^{\wedge}\text{N}^{\wedge}\text{C})(\text{cod})\text{Cl}\cdot\text{HgCl}_2]$  (**5**·**HgCl<sub>2</sub>**) in  $\text{CH}_2\text{Cl}_2$  at room temperature.

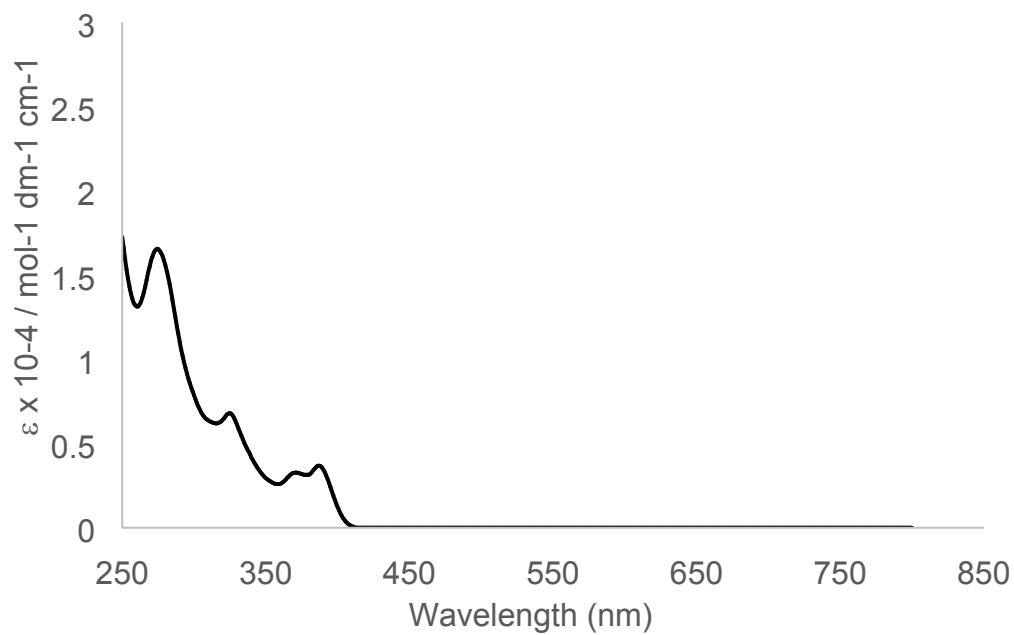

**Figure S5.** UV-visible spectrum of  $[\text{Ir}(\text{C}^{\wedge}\text{N}^{\wedge}\text{C})(\text{cod})\text{Cl}]$  (**5**) in  $\text{CH}_2\text{Cl}_2$  at room temperature.

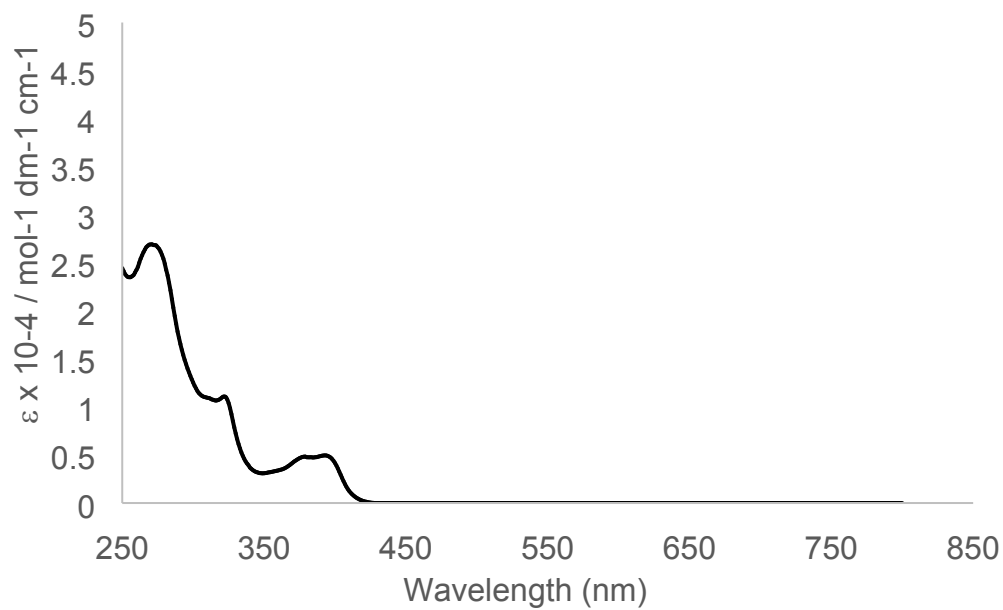

**Figure S6.** UV-visible spectrum of  $[\text{Ir}(\text{C}^{\wedge}\text{N}^{\wedge}\text{C})(\text{cod})(\text{H}_2\text{O})][\text{OTf}]$  (**6**) in  $\text{CH}_2\text{Cl}_2$  at room temperature.

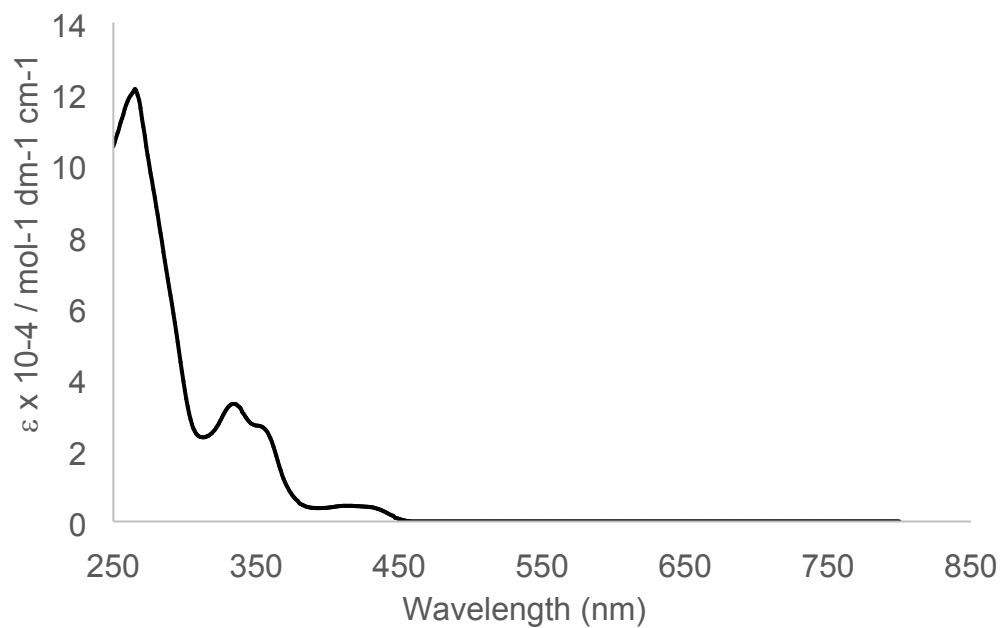

**Figure S7.** UV-visible spectrum of  $[\text{Ir}(\text{C}^{\wedge}\text{N}^{\wedge}\text{C})(\text{HgCl})(\text{CO})(\text{py})]$  (**7**) in  $\text{CH}_2\text{Cl}_2$  at room temperature.

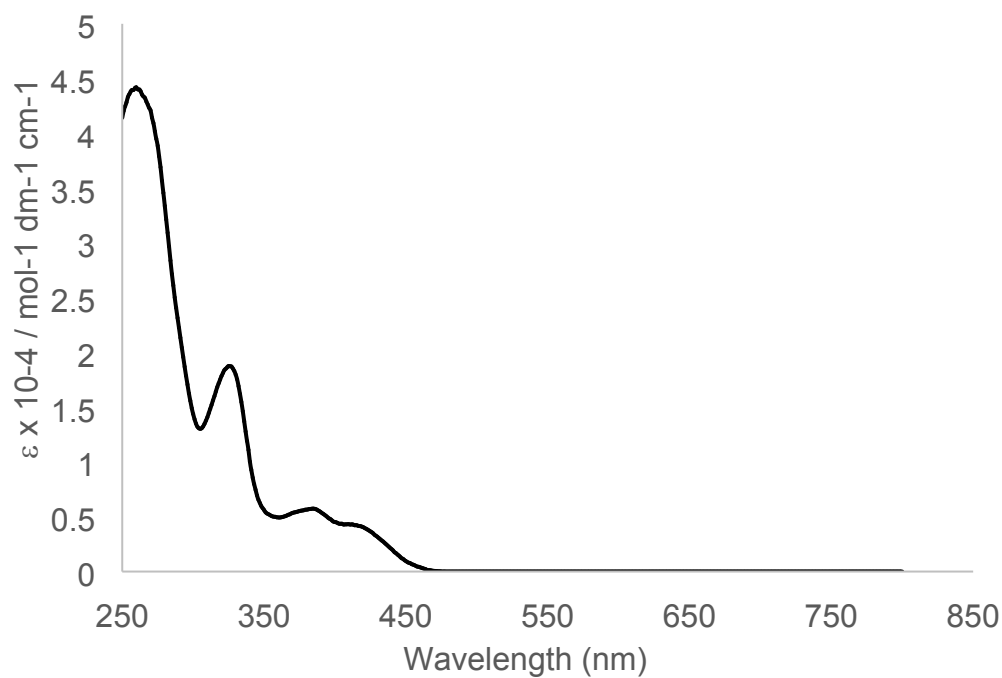

**Figure S8.** UV-visible spectrum of  $[\text{Ir}(\text{C}^{\wedge}\text{N}^{\wedge}\text{C})(\kappa^2\text{-HC}^{\wedge}\text{N}^{\wedge}\text{C})(\text{CO})]$  (**8**) in  $\text{CH}_2\text{Cl}_2$  at room temperature.

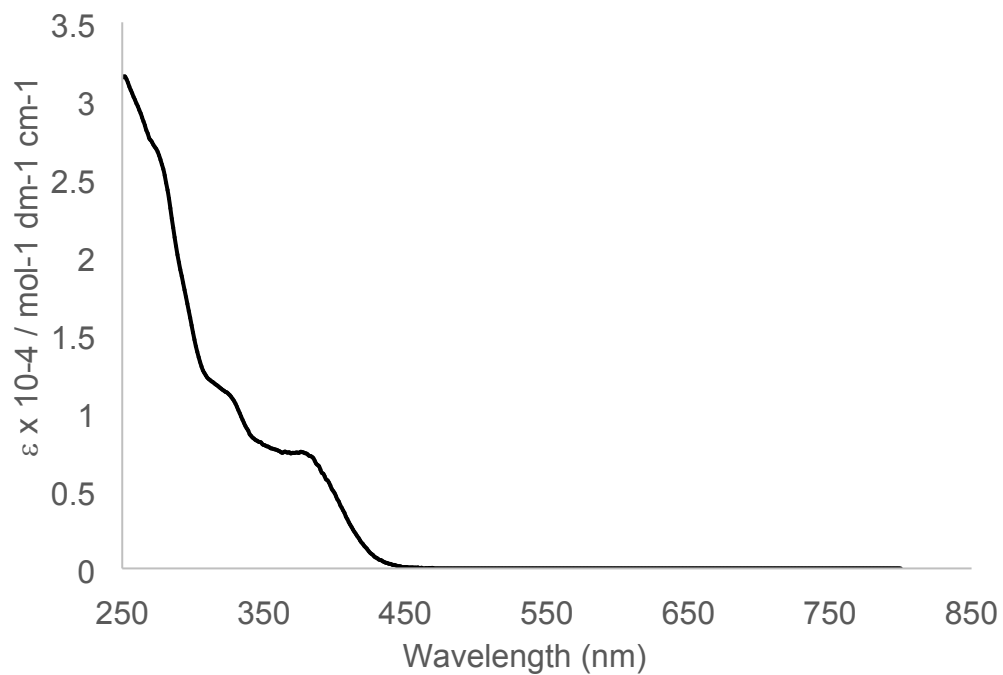

**Figure S9.** UV-visible spectrum of **8'** in  $\text{CH}_2\text{Cl}_2$  at room temperature.

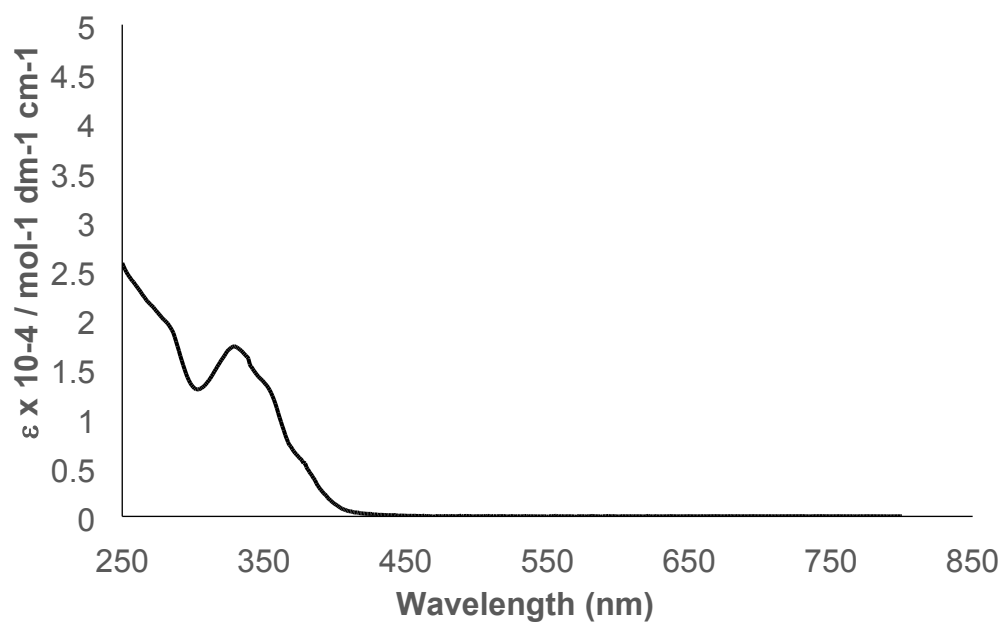

**Figure S10.** UV-visible spectrum of  $[\text{Ir}(\kappa^2\text{-HC}^{\wedge}\text{N}^{\wedge}\text{C})_2(\text{OTs})(\text{CO})]$  (**9**) in  $\text{CH}_2\text{Cl}_2$  at room temperature.



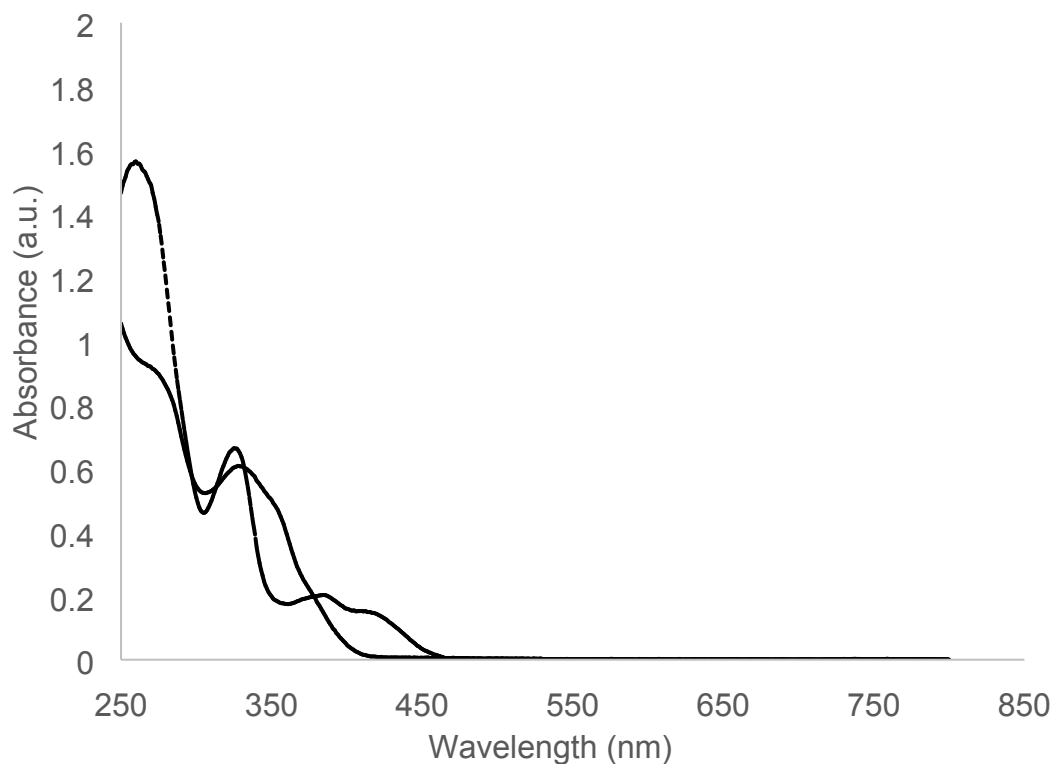

**Figure S11.** UV-visible spectra of **8** (dashed line) and the product of oxidation of **8** with (4-BrC<sub>6</sub>H<sub>4</sub>)<sub>3</sub>NSbCl<sub>6</sub> (solid line) in CH<sub>2</sub>Cl<sub>2</sub>.

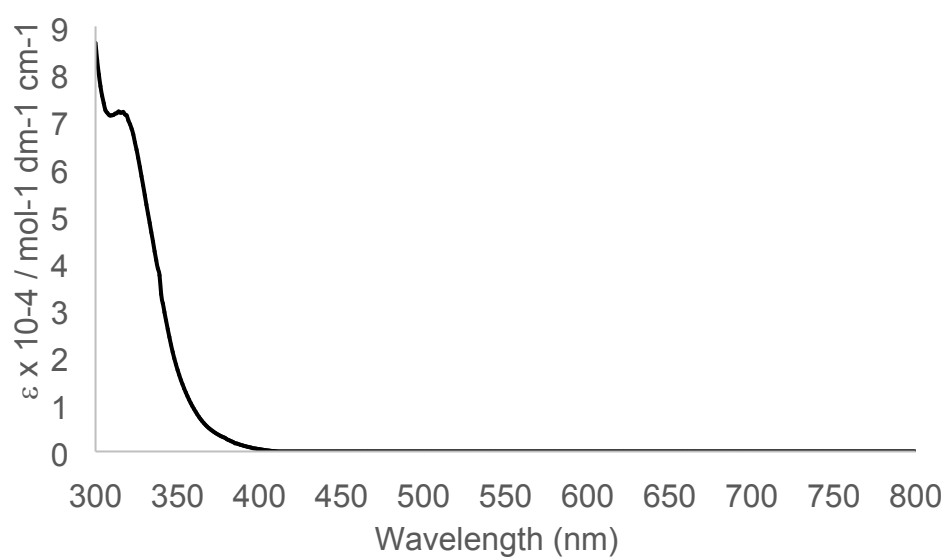

**Figure S12.** UV-visible spectrum of [Ir(PPh<sub>3</sub>)(κ<sup>2</sup>-P,C-C<sub>6</sub>H<sub>4</sub>PPh<sub>2</sub>)<sub>2</sub>Cl] (**10**) in CH<sub>2</sub>Cl<sub>2</sub>.

## Emission Spectra

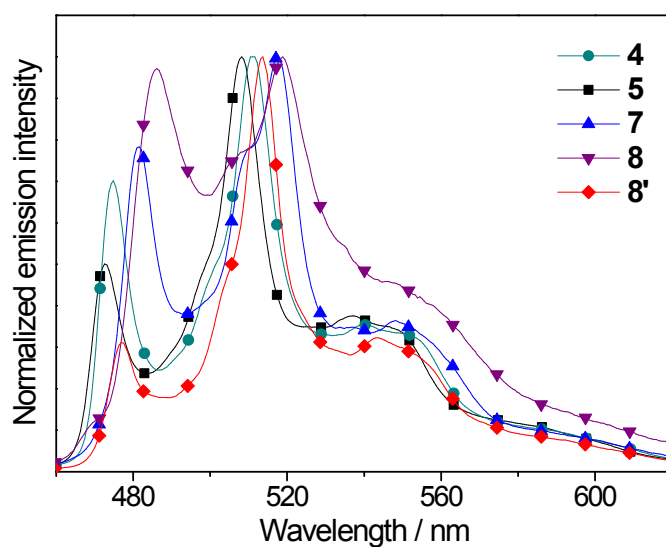

**Figure S13.** Overlaid normalized emission spectra of **4**, **5**, **7**, **8** and **8'** in 77 K EtOH-MeOH (4:1, v/v) glassy medium.

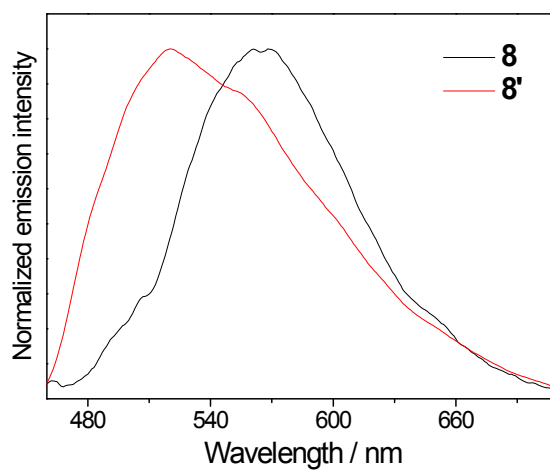

**Figure S14.** Overlaid emission spectra of  $[\text{Ir}(\text{C}^{\wedge}\text{N}^{\wedge}\text{C})(\kappa^2\text{-HC}^{\wedge}\text{N}^{\wedge}\text{C})(\text{CO})]$  (**8**) and its isomer (**8'**) in 298 K  $\text{CH}_2\text{Cl}_2$  solution.

## FT-IR spectra

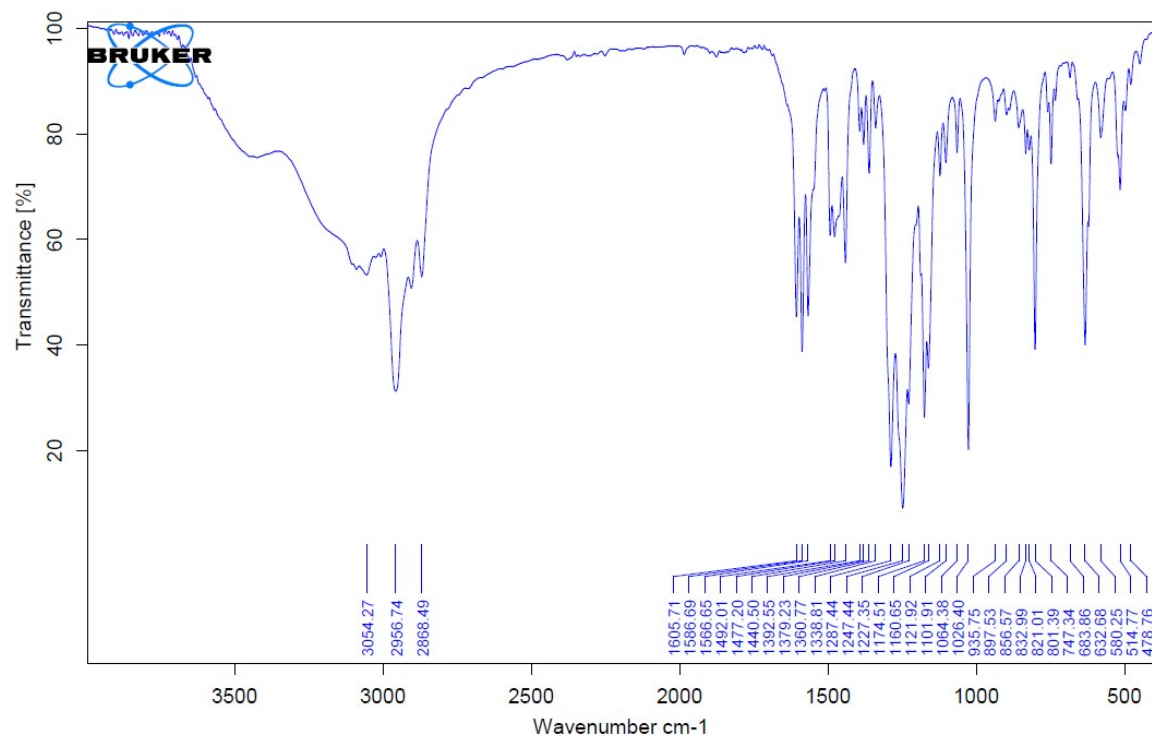

**Figure S15.** FT-IR (KBr) spectrum of [Ir(C<sup>N</sup>C)(cod)(H<sub>2</sub>O)](OTf) (6).

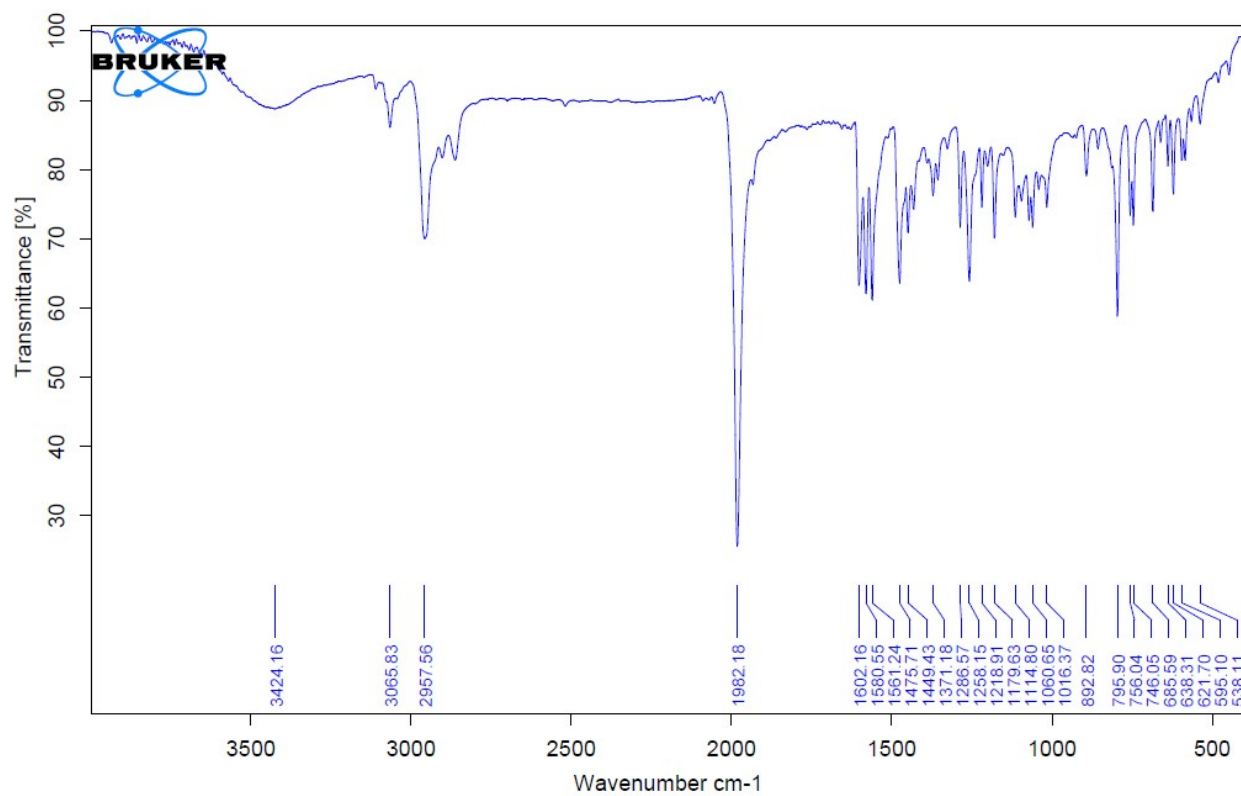

**Figure S16.** FT-IR (KBr) spectrum of  $[\text{Ir}(\text{C}^{\wedge}\text{N}^{\wedge}\text{C})(\text{HgCl})(\text{CO})(\text{py})]$  (**7**).

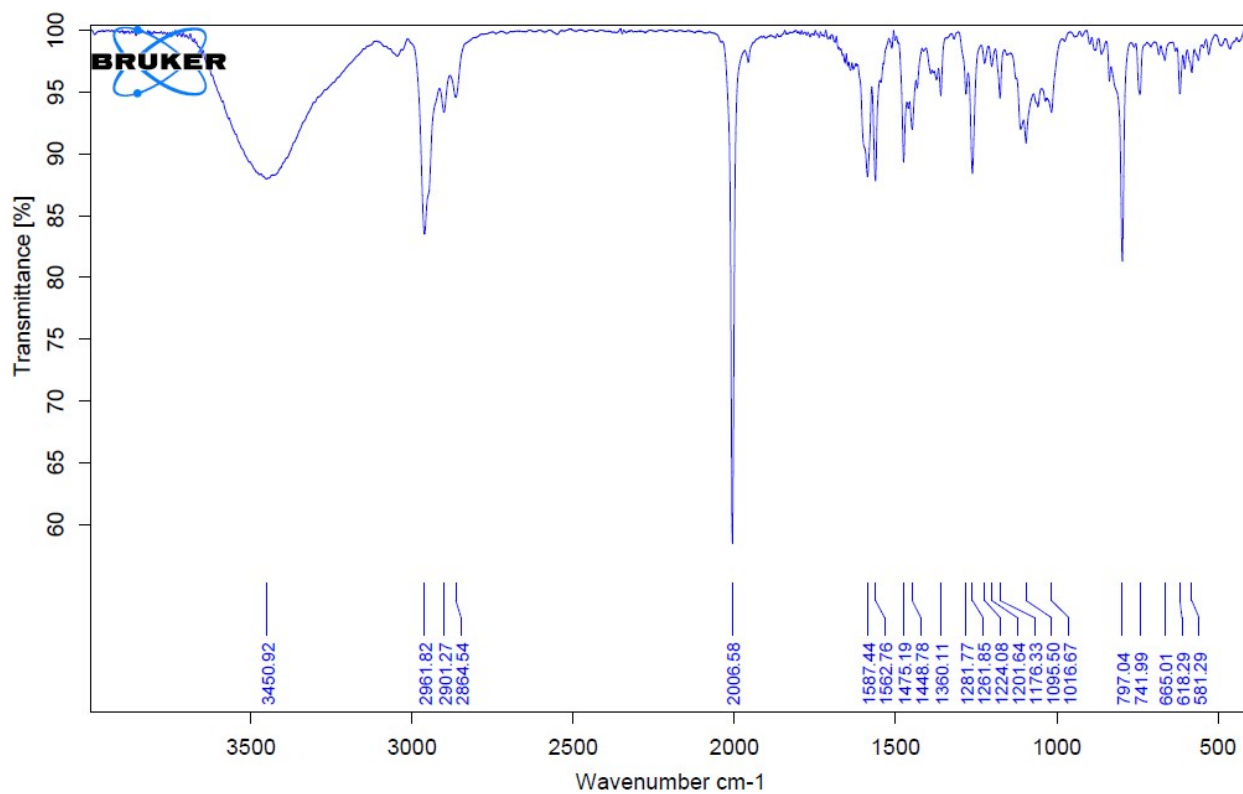

**Figure S17.** FT-IR (KBr) spectrum of  $[\text{Ir}(\text{CNC})(\kappa^2\text{-HC}^{\text{N}}\text{C})(\text{CO})]$  (**8**).

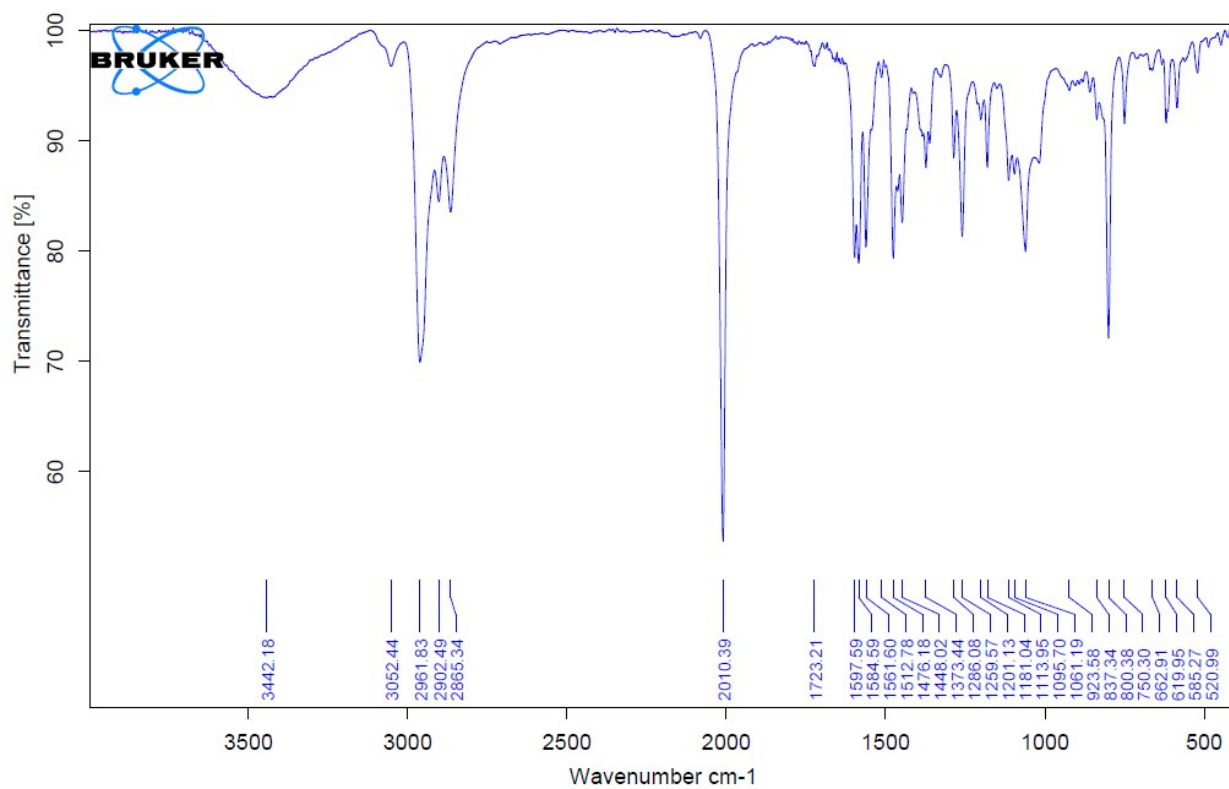

**Figure S18.** FT-IR (KBr) spectrum of **8'**.

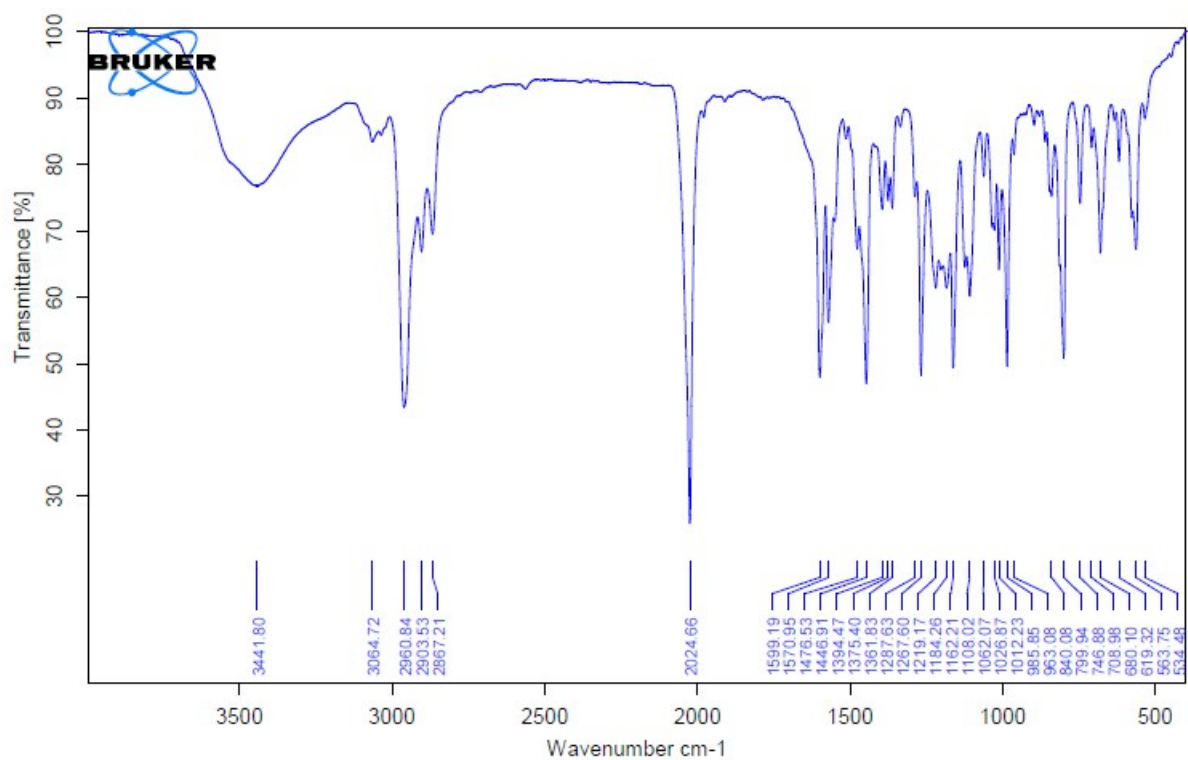

**Figure S19.** FT-IR (KBr) spectrum of **9**.

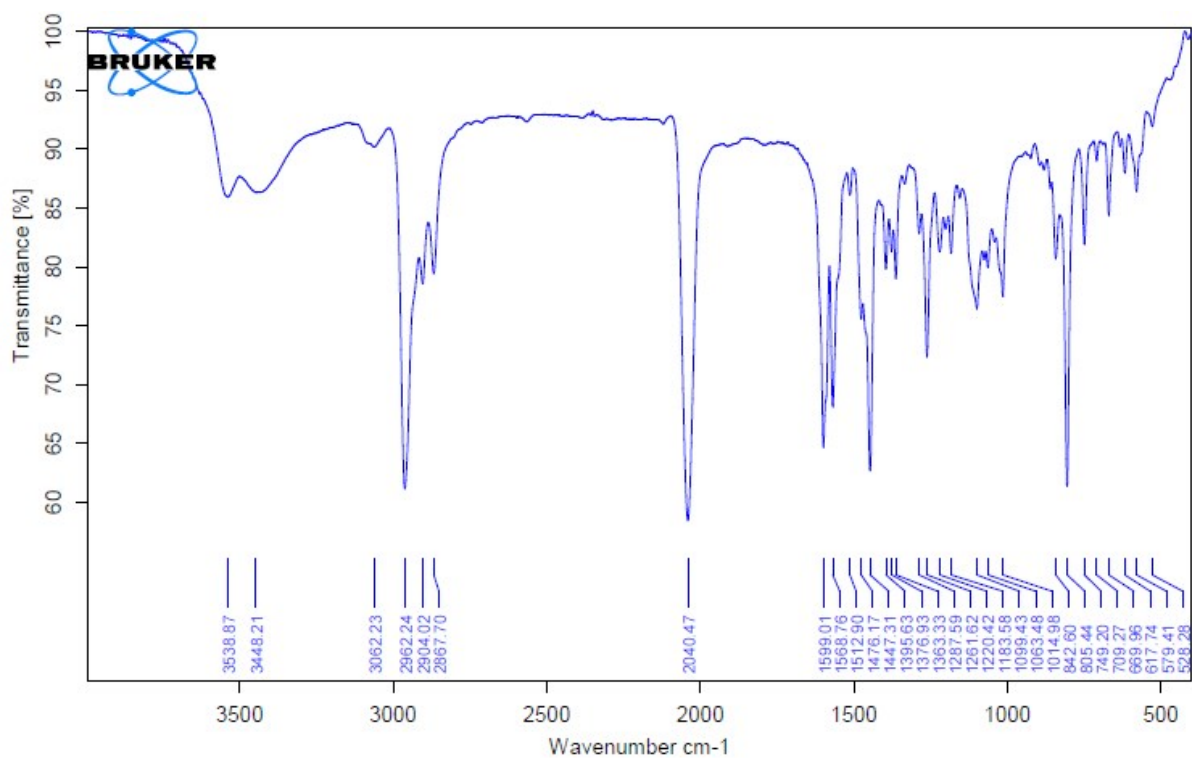

**Figure S20.** FT-IR (KBr) spectrum of the product of oxidation **8** by  $(\text{Br-C}_6\text{H}_4)_3\text{NSbCl}_6$



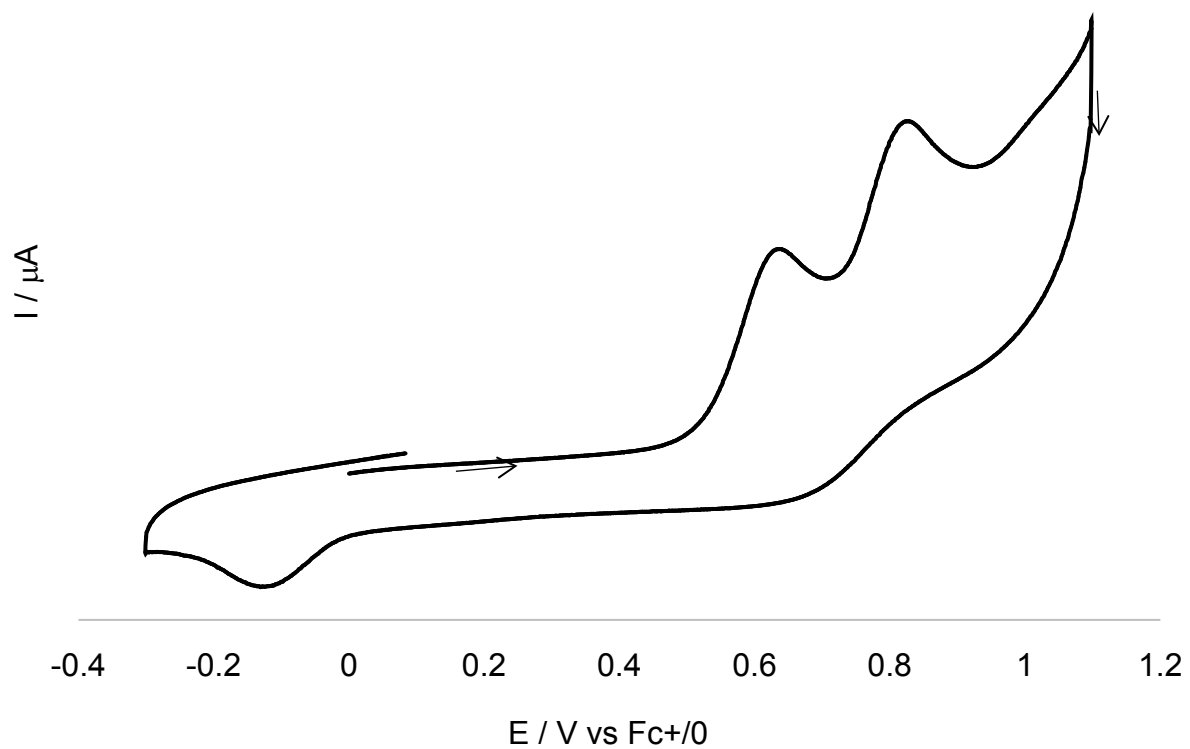

**Figure S21.** Cyclic voltammogram of **5** in  $\text{CH}_2\text{Cl}_2$  with 0.2 M  $[\text{nBu}_4\text{N}]\text{PF}_6$  as supporting electrolyte (working electrode: glassy carbon, scan rate =  $100 \text{ mV s}^{-1}$ ).

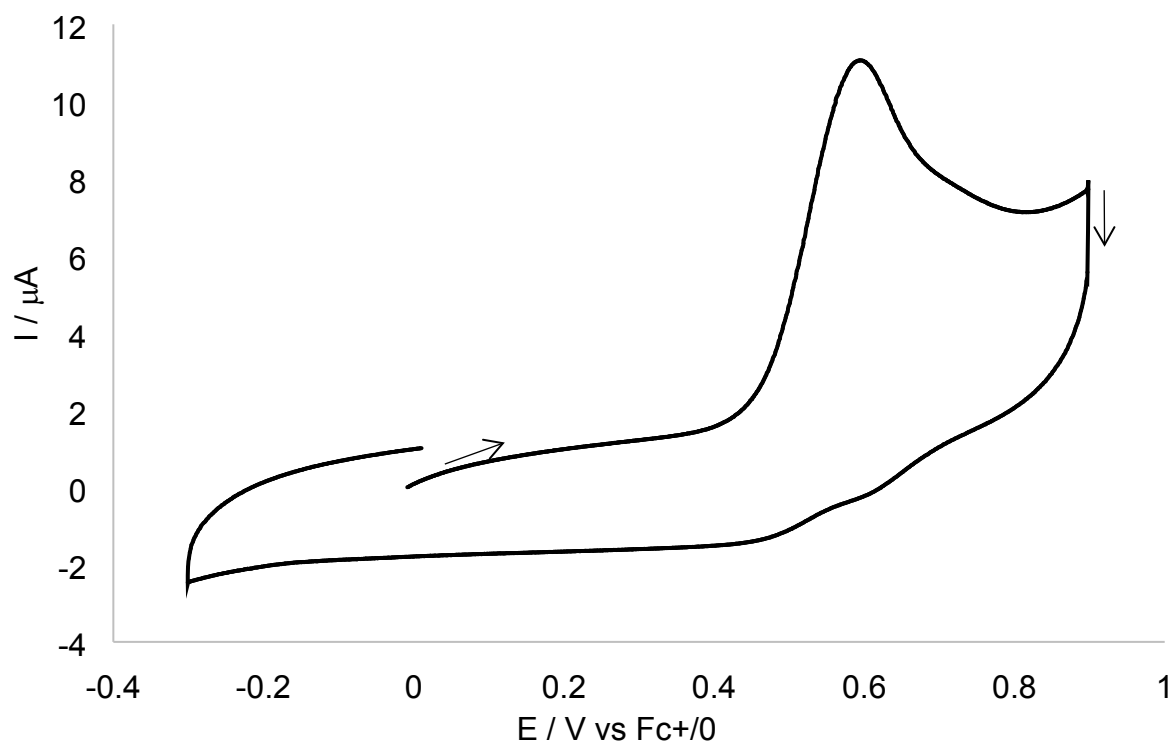

**Figure S22.** Cyclic voltammogram of **7** in  $\text{CH}_2\text{Cl}_2$  with 0.2 M  $[\text{nBu}_4\text{N}]\text{PF}_6$  as supporting electrolyte (working electrode: glassy carbon, scan rate =  $100 \text{ mV s}^{-1}$ ).

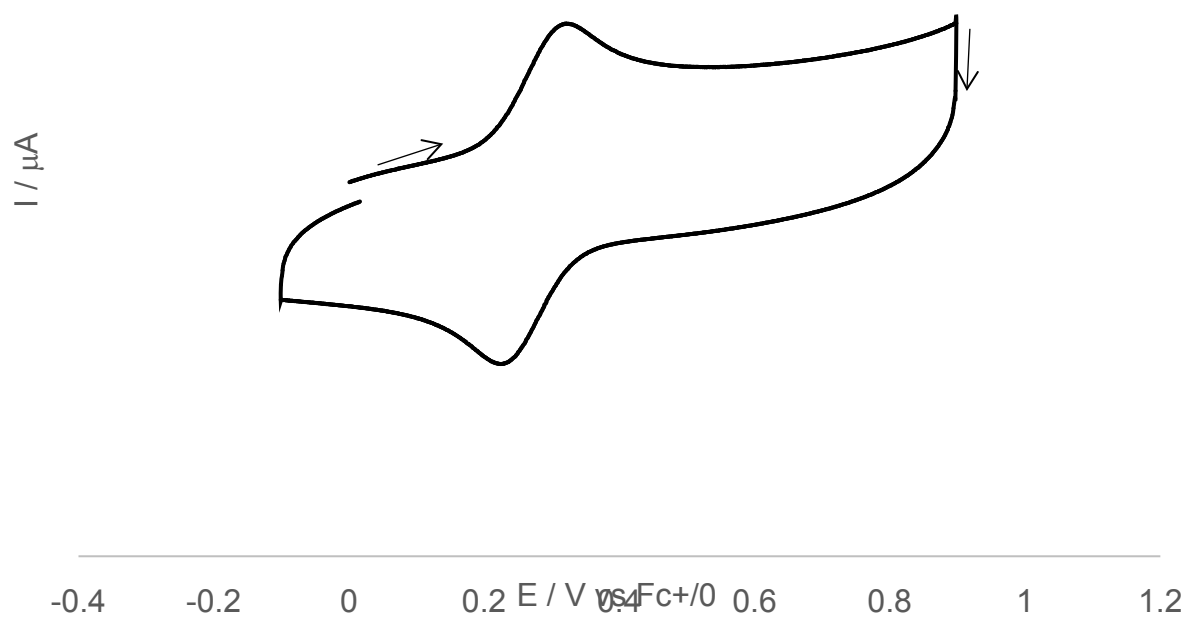

**Figure S23.** Cyclic voltammogram of **8** in  $\text{CH}_2\text{Cl}_2$  with 0.2 M  $[\text{nBu}_4\text{N}]\text{PF}_6$  as supporting electrolyte (working electrode: glassy carbon, scan rate =  $100 \text{ mV s}^{-1}$ ).

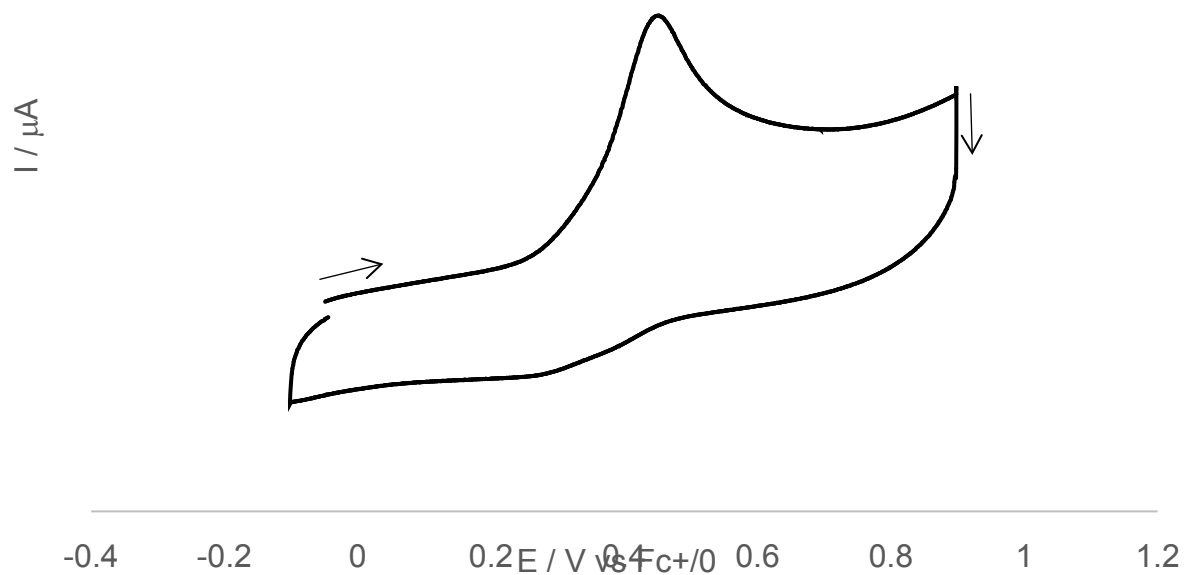

**Figure S24.** Cyclic voltammogram of **8'** in  $\text{CH}_2\text{Cl}_2$  with 0.2 M  $[\text{nBu}_4\text{N}]\text{PF}_6$  as supporting electrolyte (working electrode: glassy carbon, scan rate =  $100 \text{ mV s}^{-1}$ ).

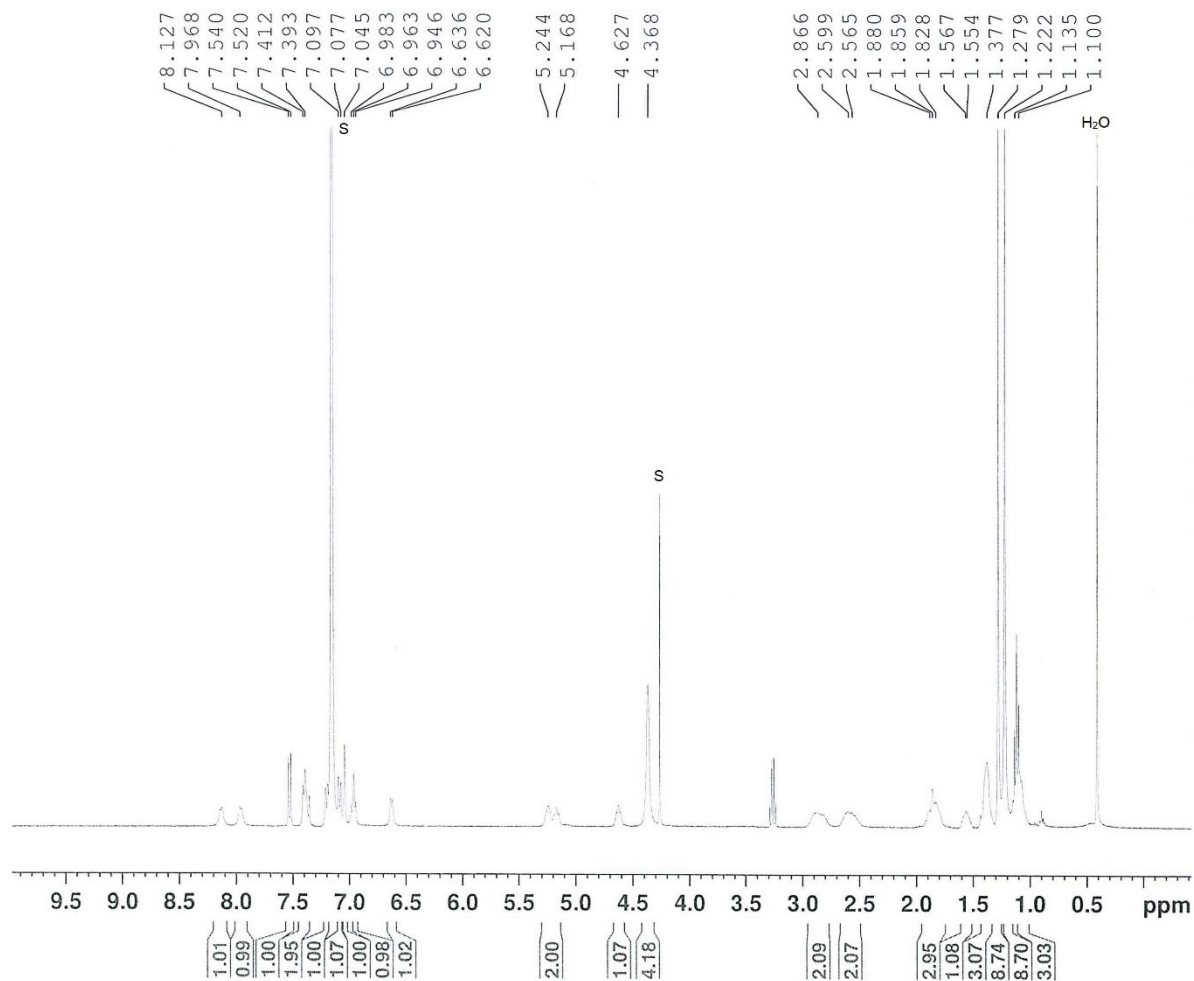

**Figure S25.**  $^1\text{H}$  NMR (400 MHz, 298 K,  $\text{C}_6\text{D}_6$ ) spectrum of **2** (S = residual solvent).

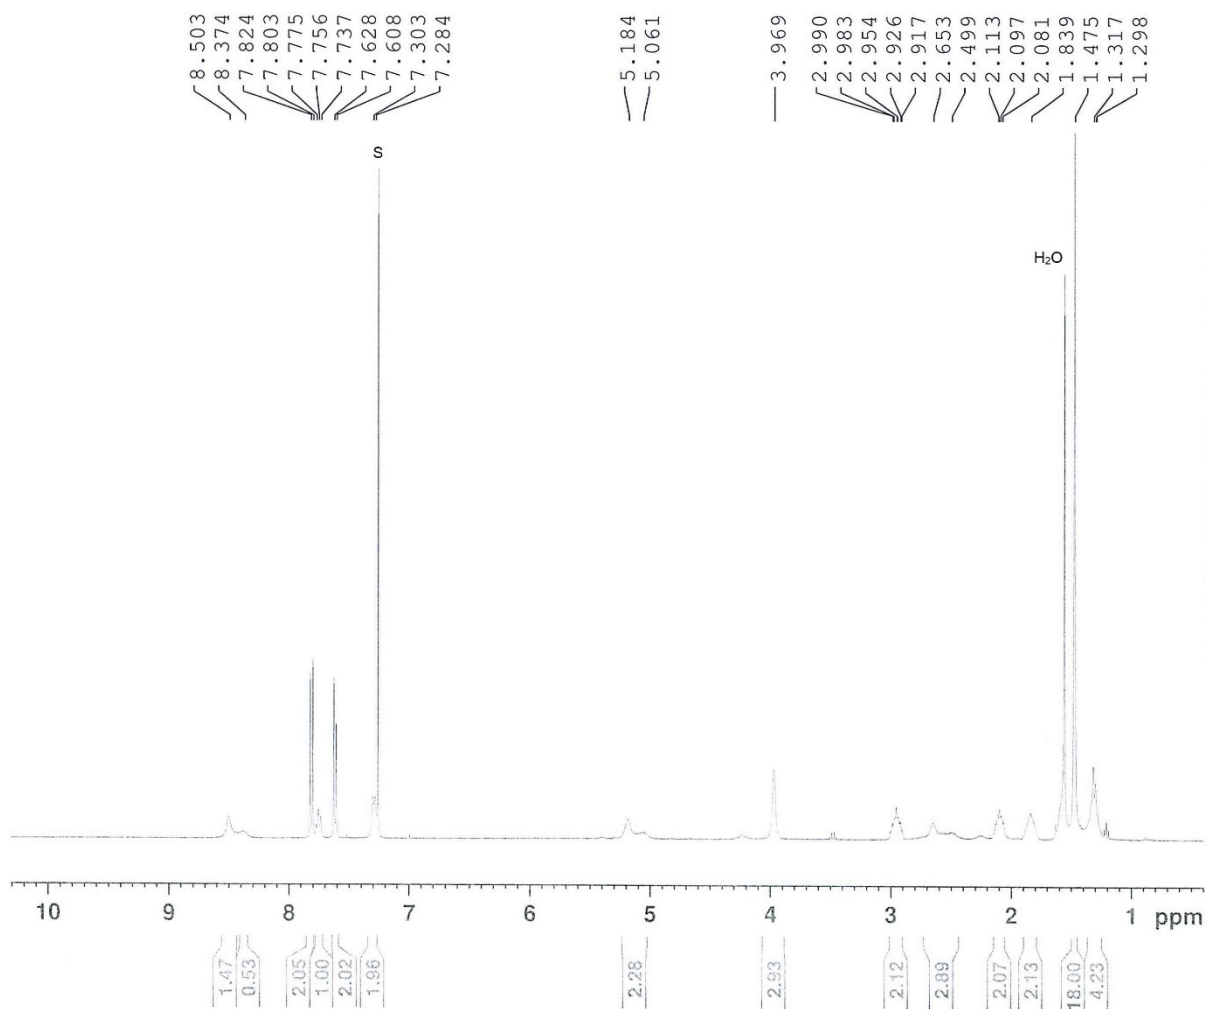

**Figure S26.**  $^1\text{H}$  NMR (400 MHz, 298 K,  $\text{CDCl}_3$ ) spectrum of **3** (S = residual solvent).

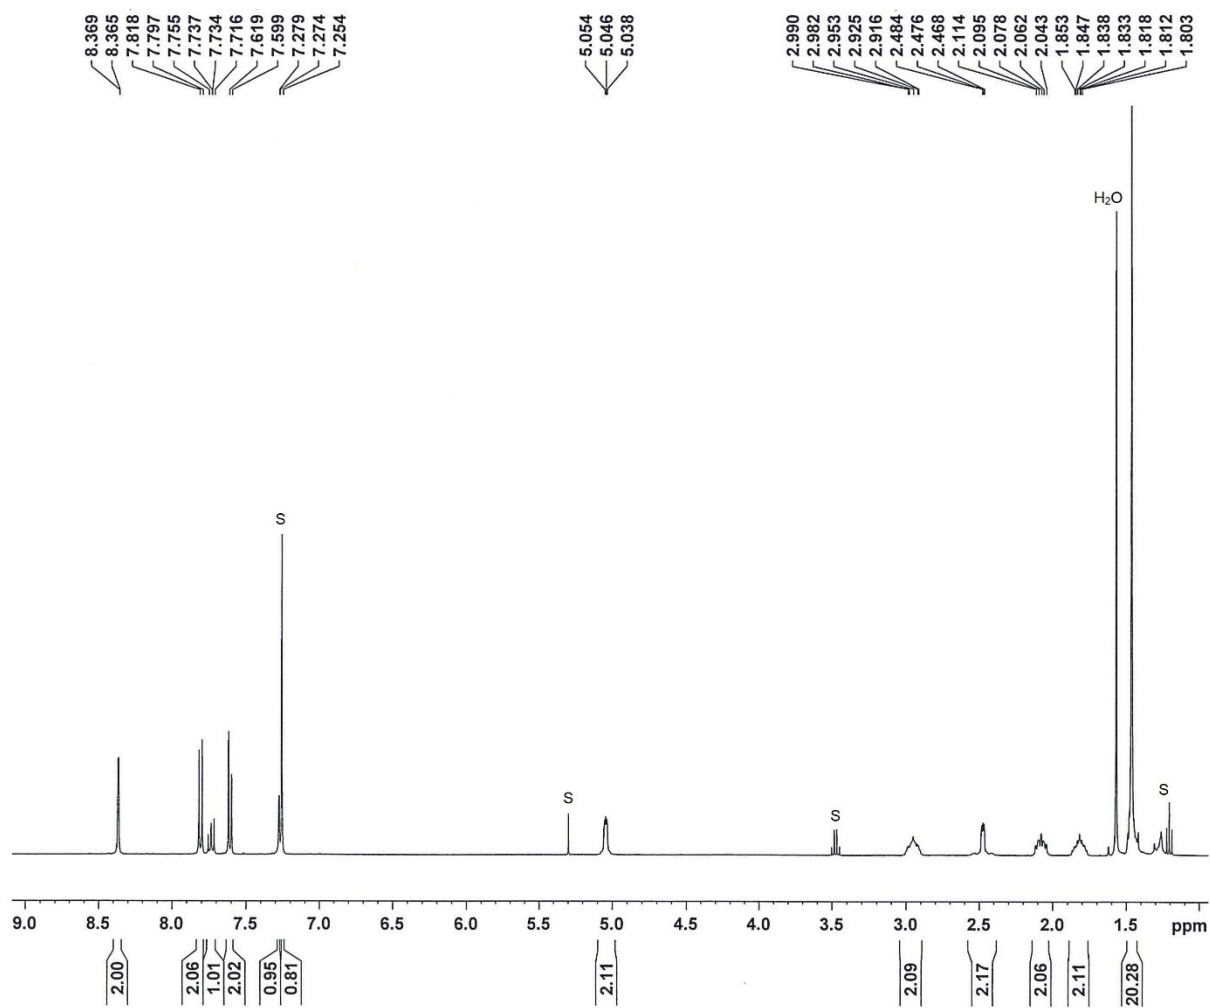

**Figure S27.**  $^1\text{H}$  NMR (400 MHz, 298 K,  $\text{CDCl}_3$ ) spectrum of **4** (S = residual solvent).

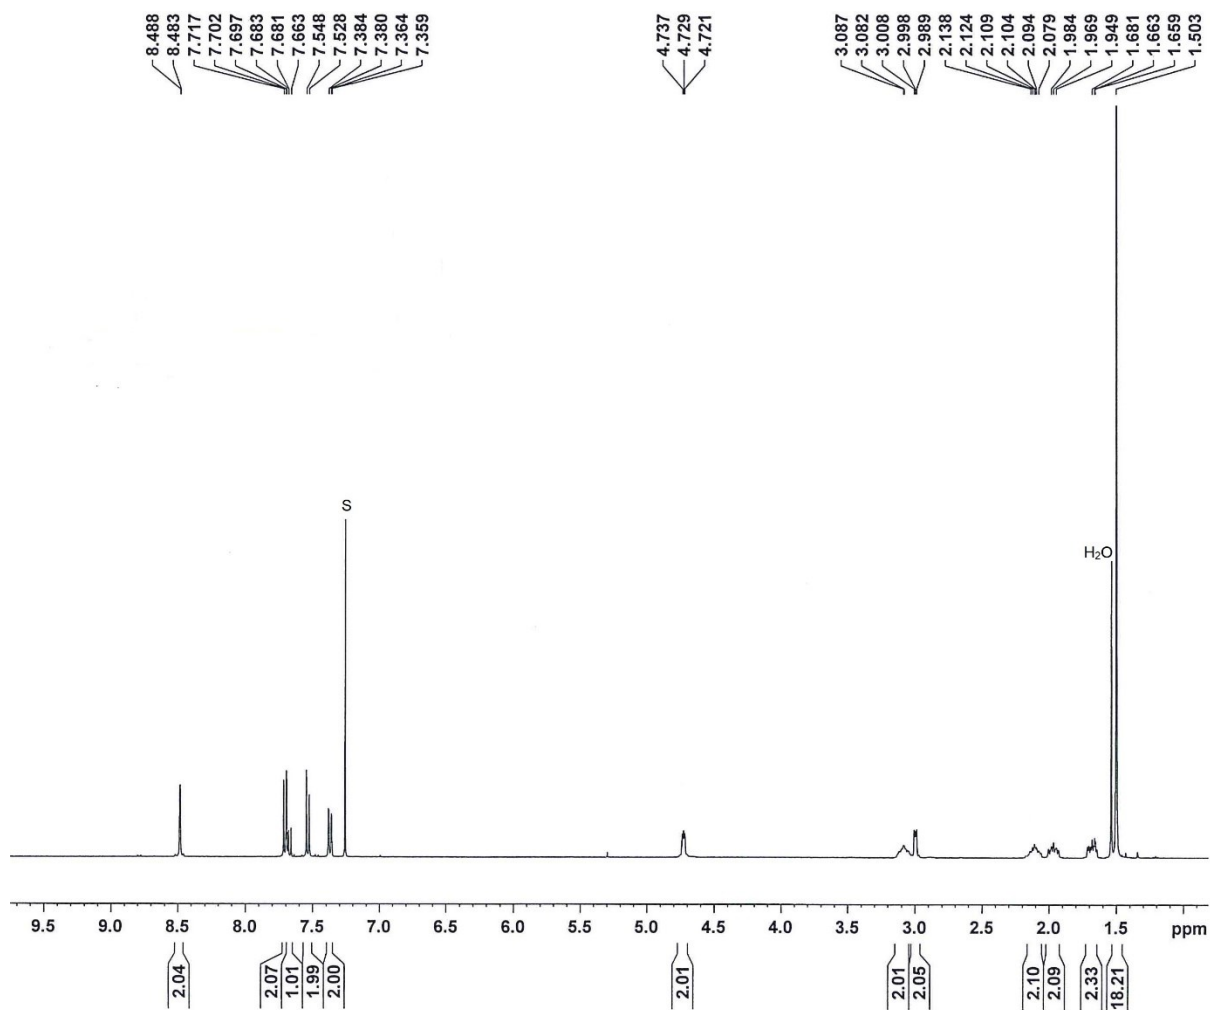

**Figure S28.**  $^1\text{H}$  NMR (400 MHz, 298 K,  $\text{CDCl}_3$ ) spectrum of  $5 \cdot \text{HgCl}_2$  (S = residual solvent).



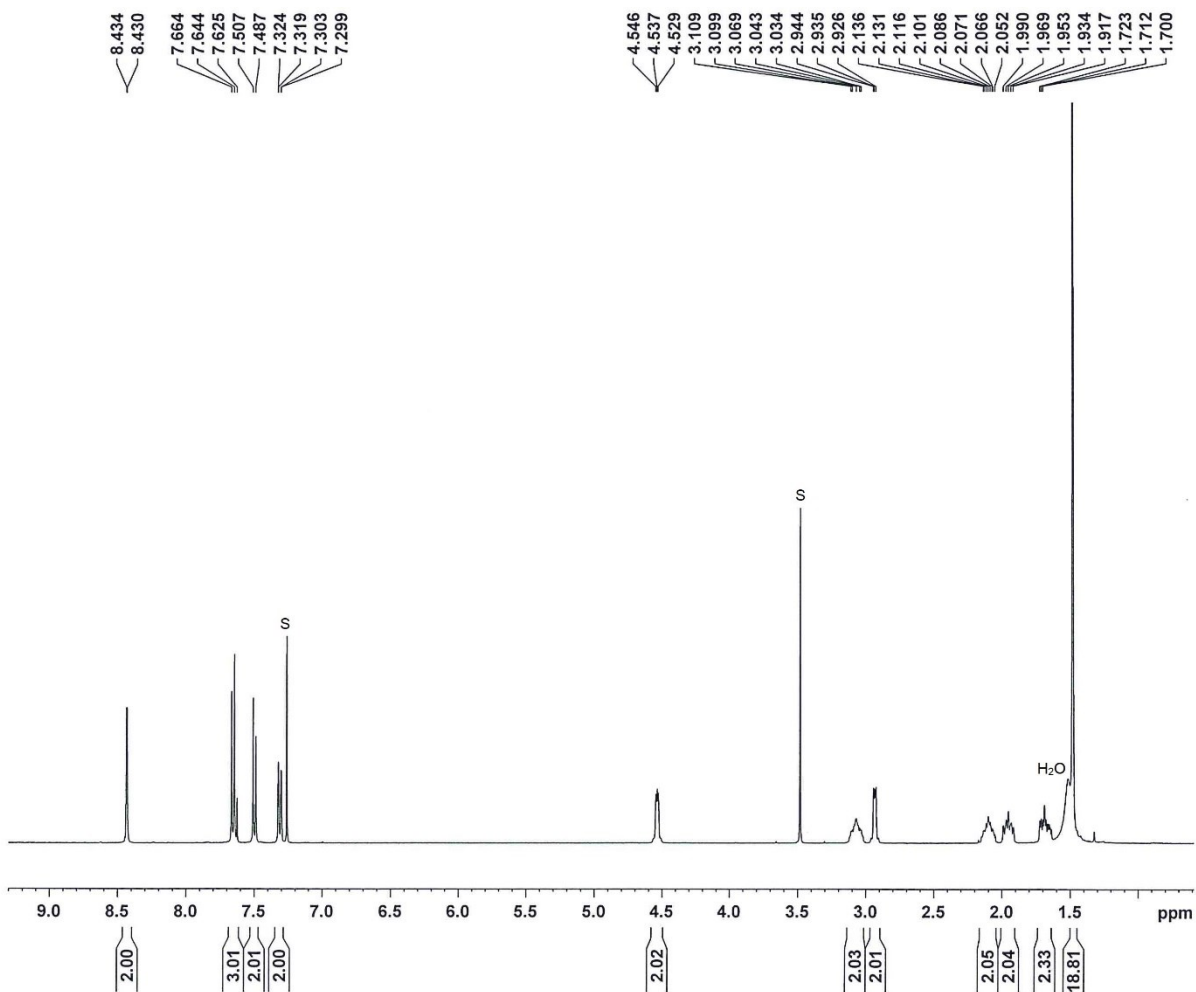

**Figure S29.** <sup>1</sup>H NMR (400 MHz, 298 K, CDCl<sub>3</sub>) spectrum of **5** (S = residual solvent).

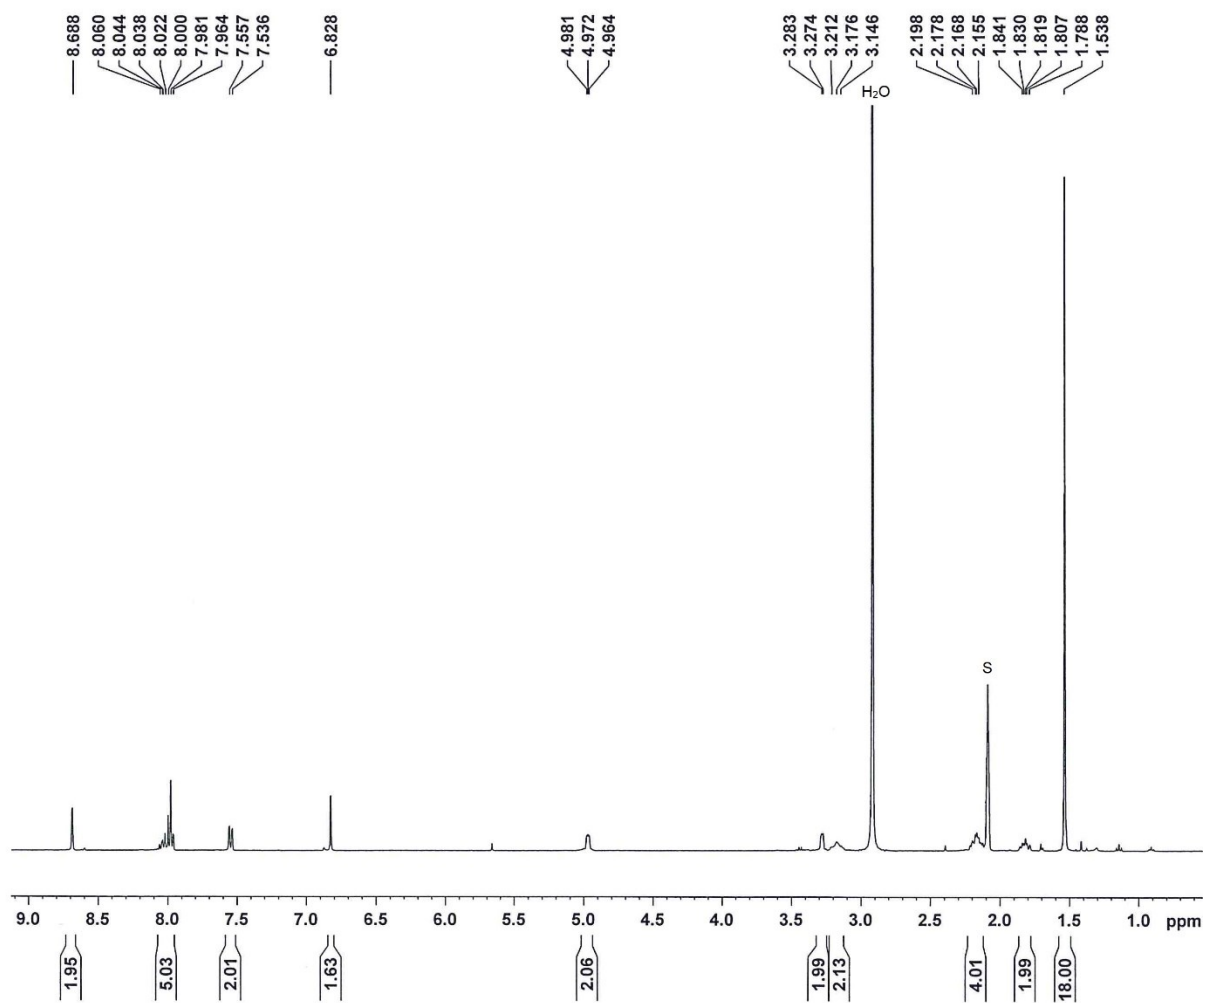

**Figure S30.**  $^1\text{H}$  NMR (400 MHz, 298 K, acetone- $d_6$ ) spectrum of **6** (S = residual solvent).

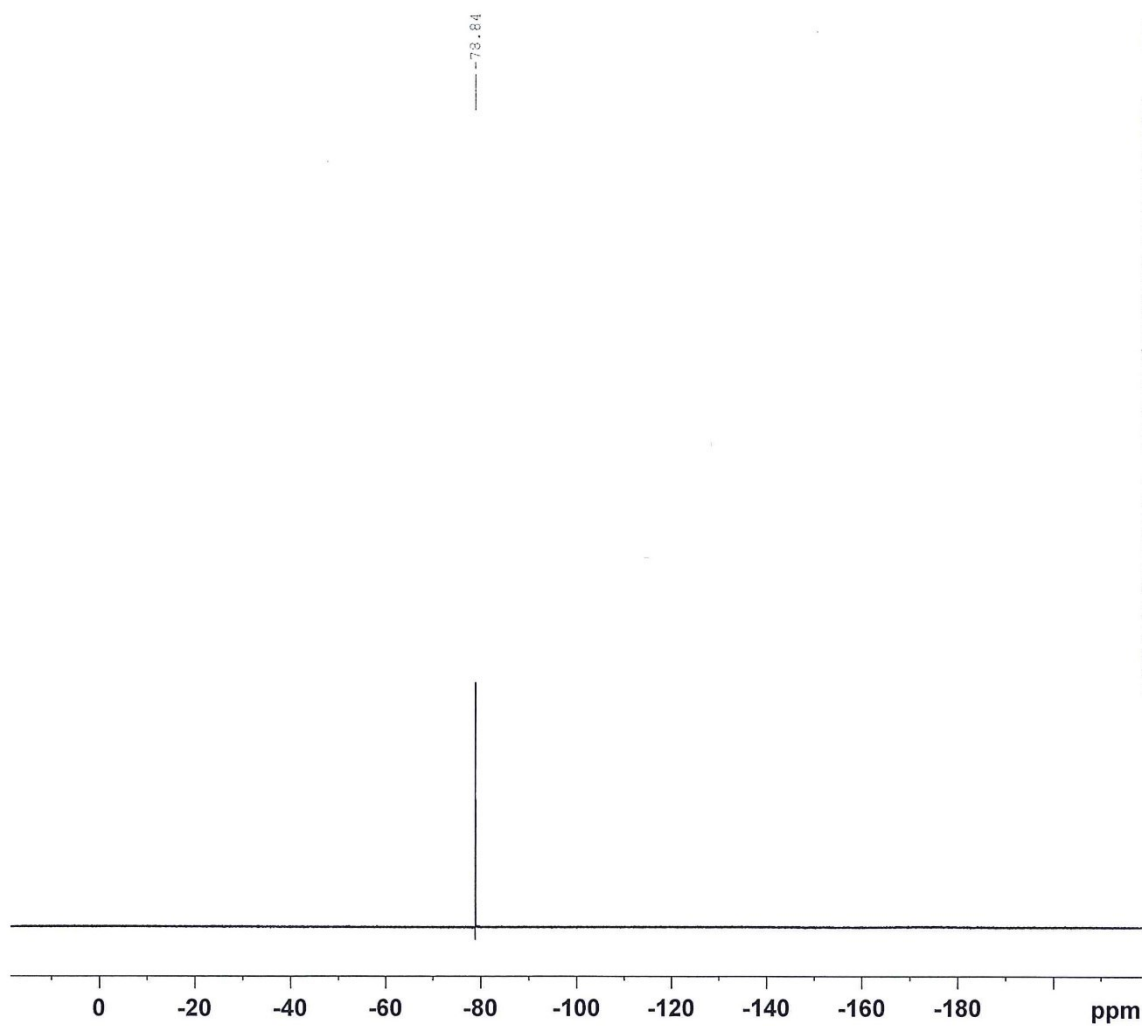

**Figure S31.**  $^{19}\text{F}\{^1\text{H}\}$  NMR (376.5 MHz, 298 K, acetone- $d_6$ ) spectrum of **6**.

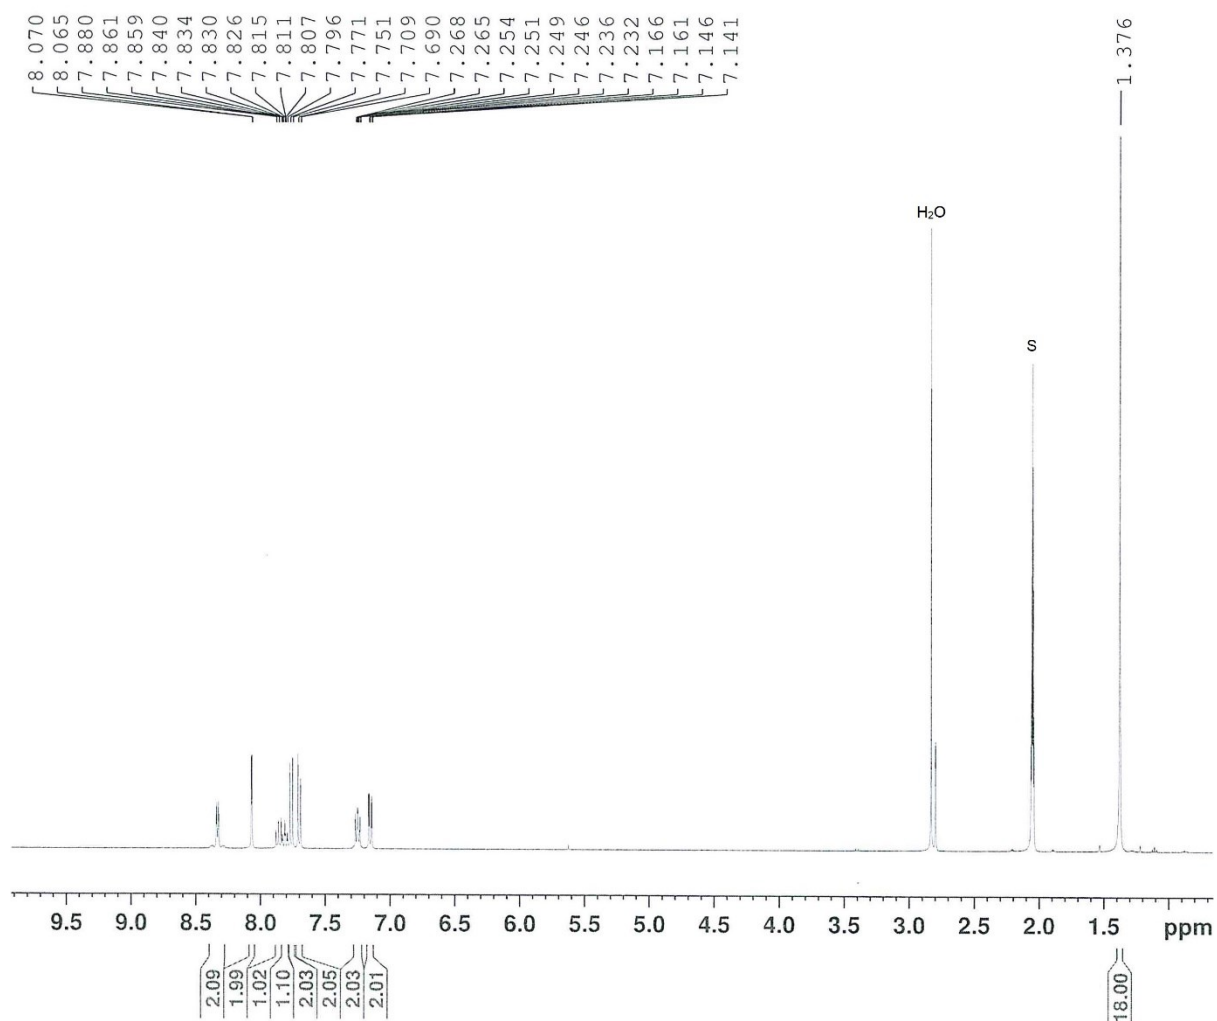

**Figure S32.**  $^1\text{H}$  NMR (400 MHz, 298 K, acetone- $d_6$ ) spectrum of **7** (S = residual solvent).

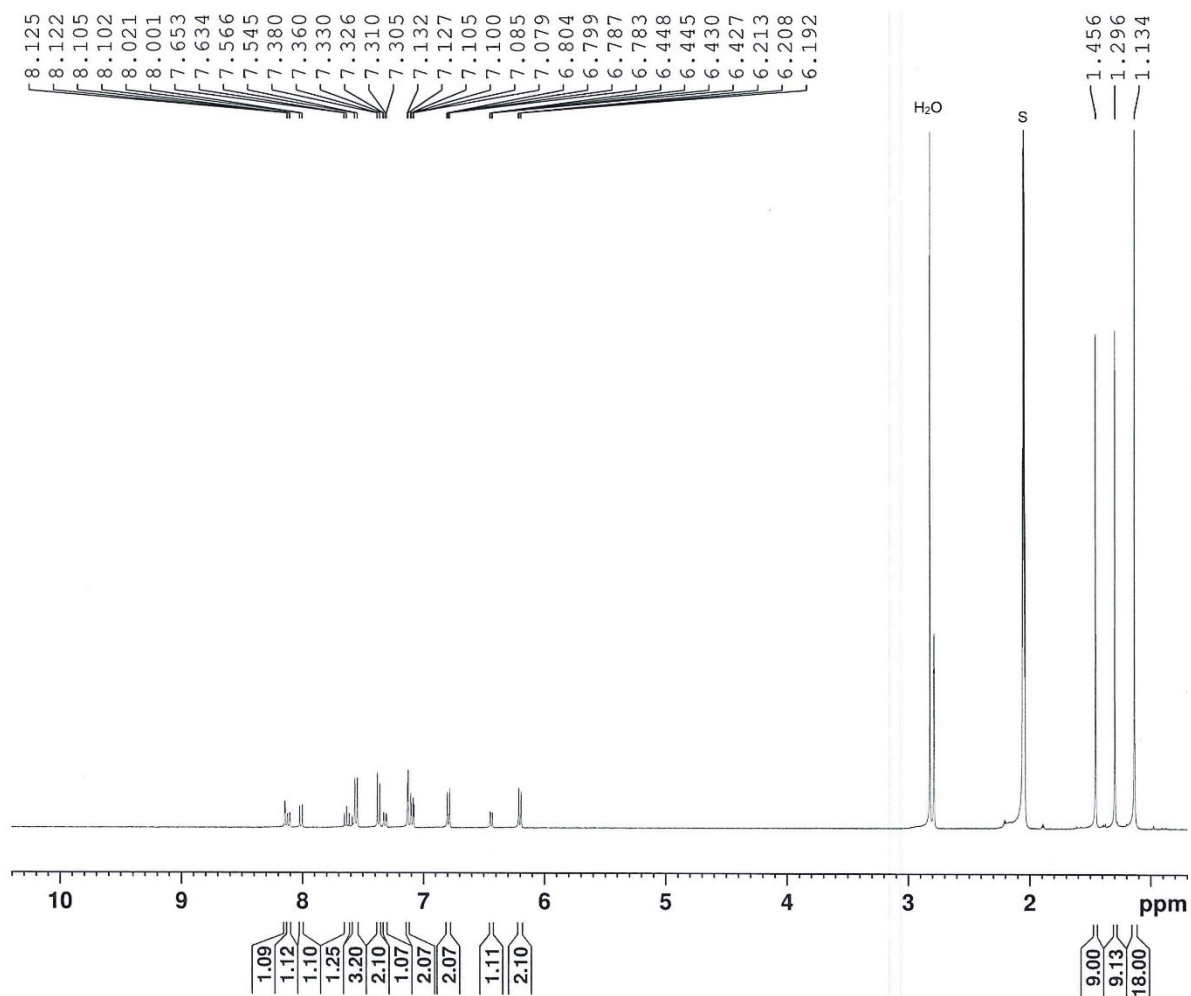

**Figure S33.** <sup>1</sup>H NMR (400 MHz, 298 K, acetone-*d*<sub>6</sub>) spectrum of **8** (S = residual solvent).

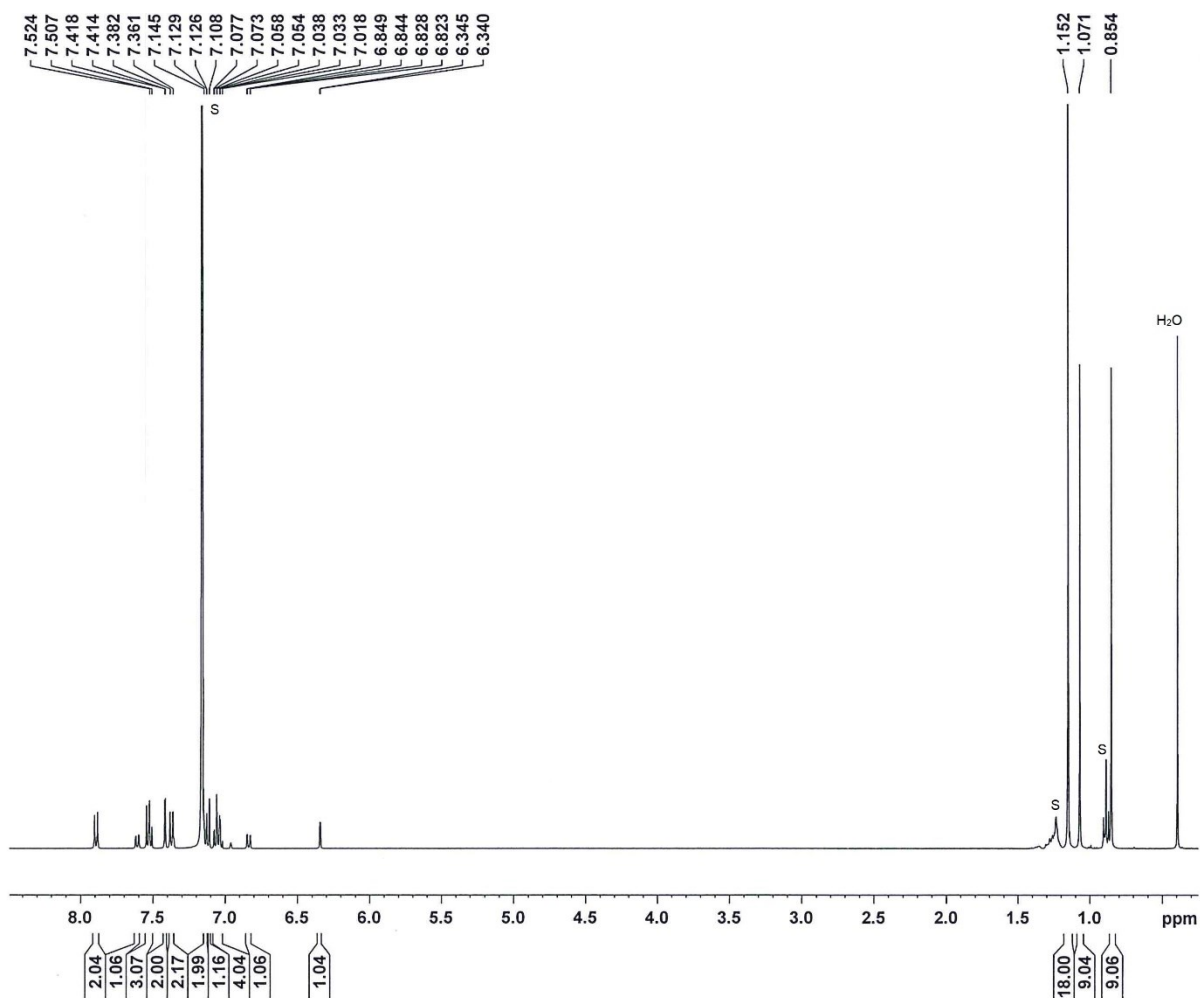

**Figure S34.**  $^1\text{H}$  NMR (400 MHz, 298 K,  $\text{CDCl}_3$ ) spectrum of **8'** (S = residual solvent).

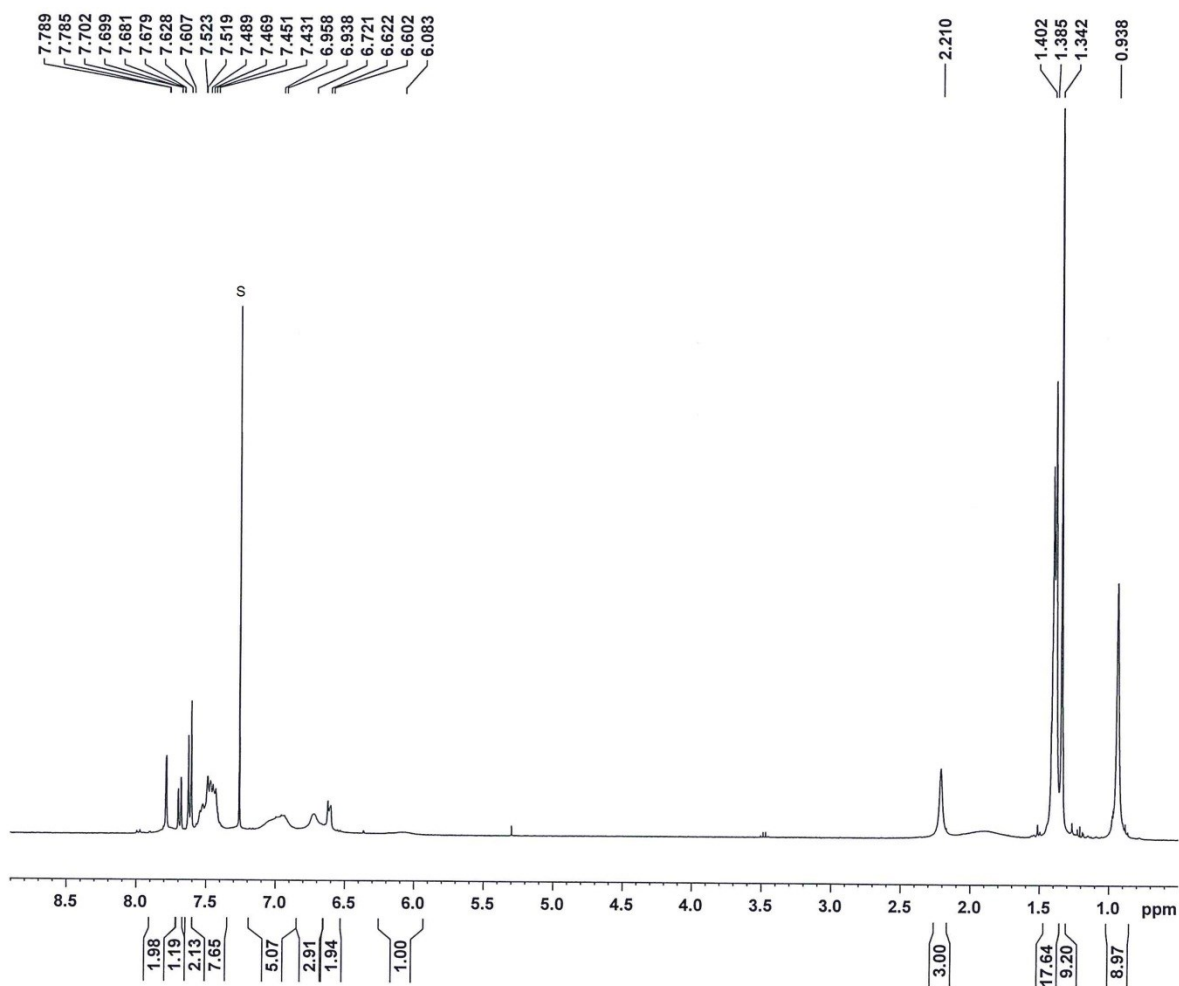

**Figure S35.**  $^1\text{H}$  NMR (400 MHz, 298 K,  $\text{CDCl}_3$ ) spectrum of **9** (S = residual solvent).

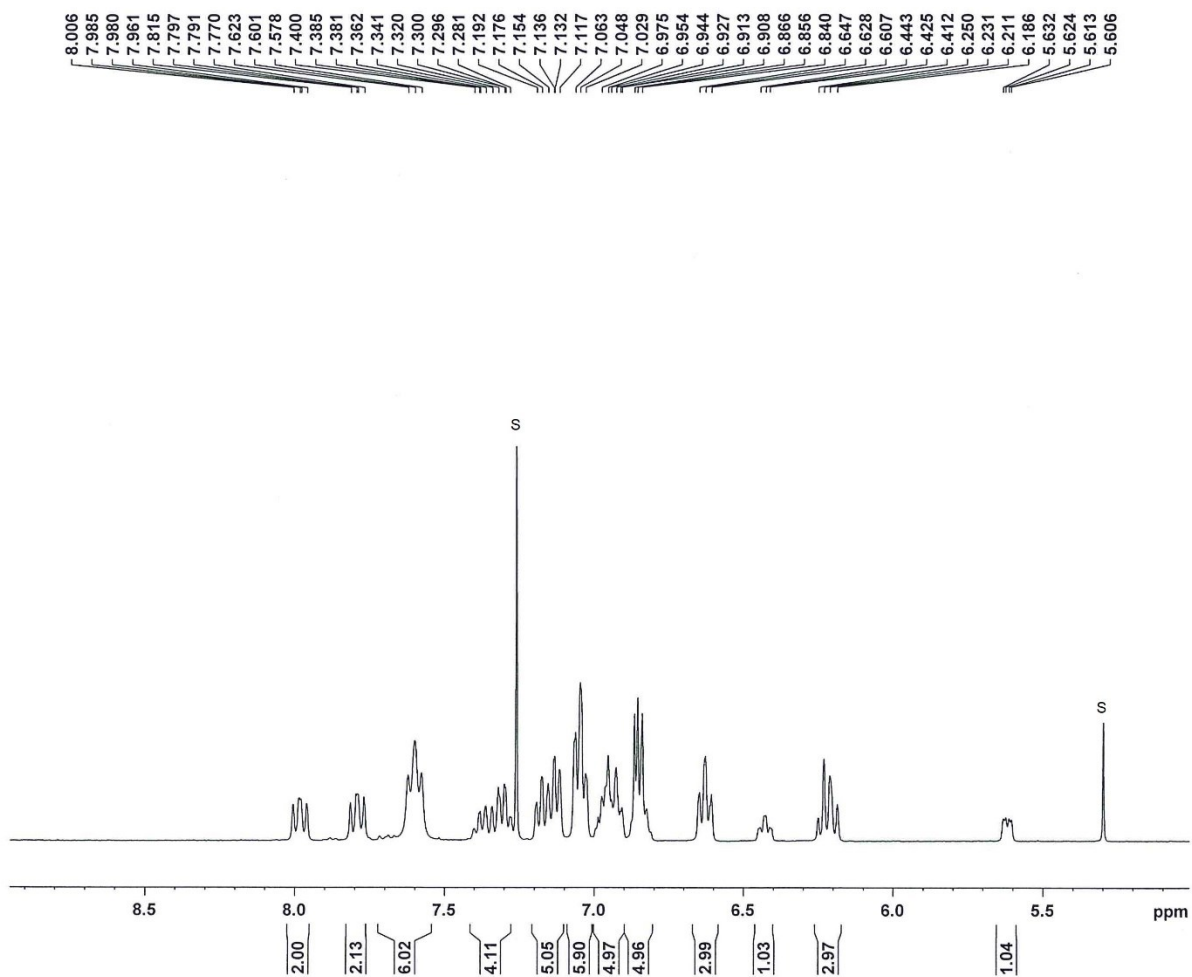

**Figure S36.**  $^1\text{H}$  NMR (400 MHz, 298 K,  $\text{CDCl}_3$ ) spectrum of **10** (S = residual solvent).



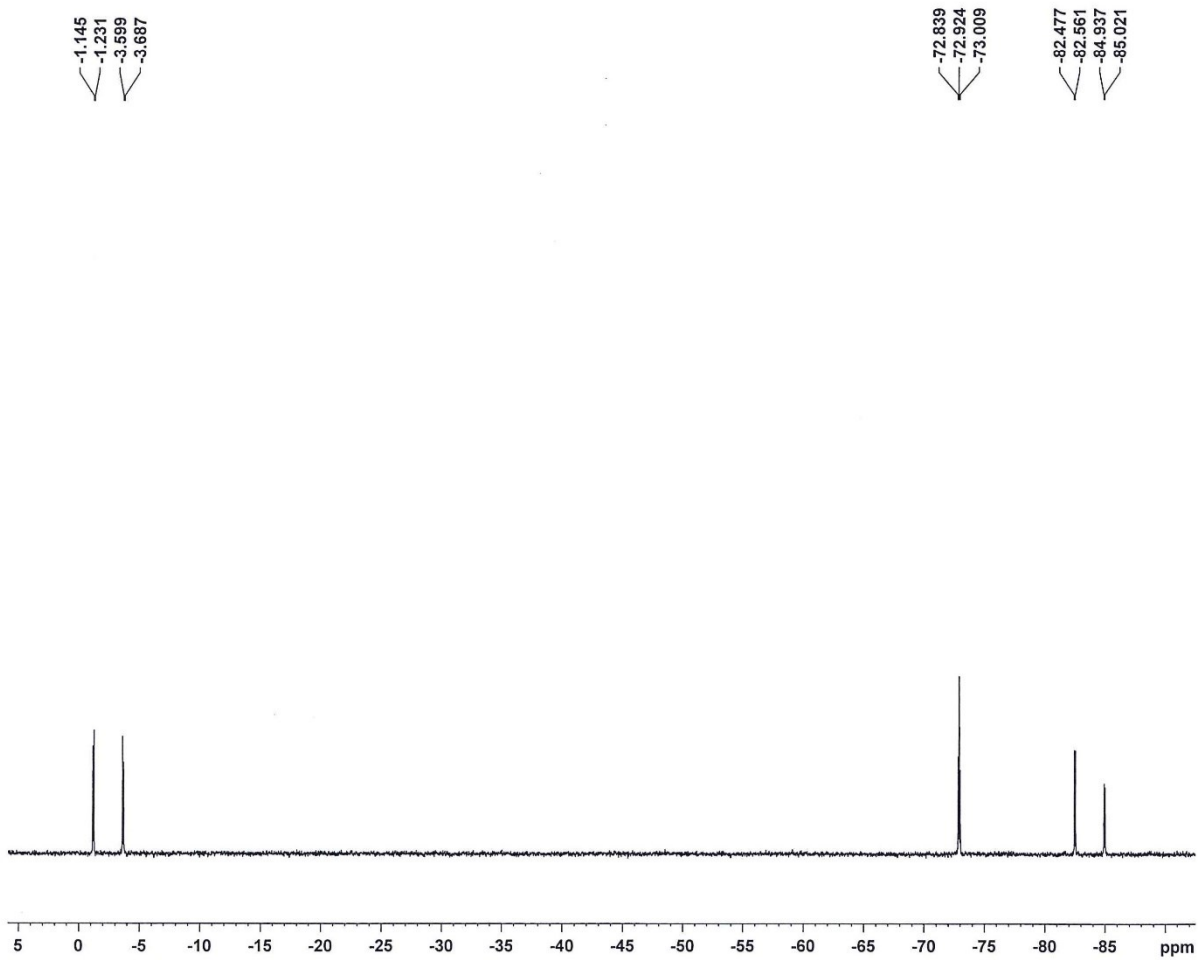

**Figure S37.**  $^{31}\text{P}\{^1\text{H}\}$  NMR (162 MHz, 298 K,  $\text{CDCl}_3$ ) spectrum of **10**.

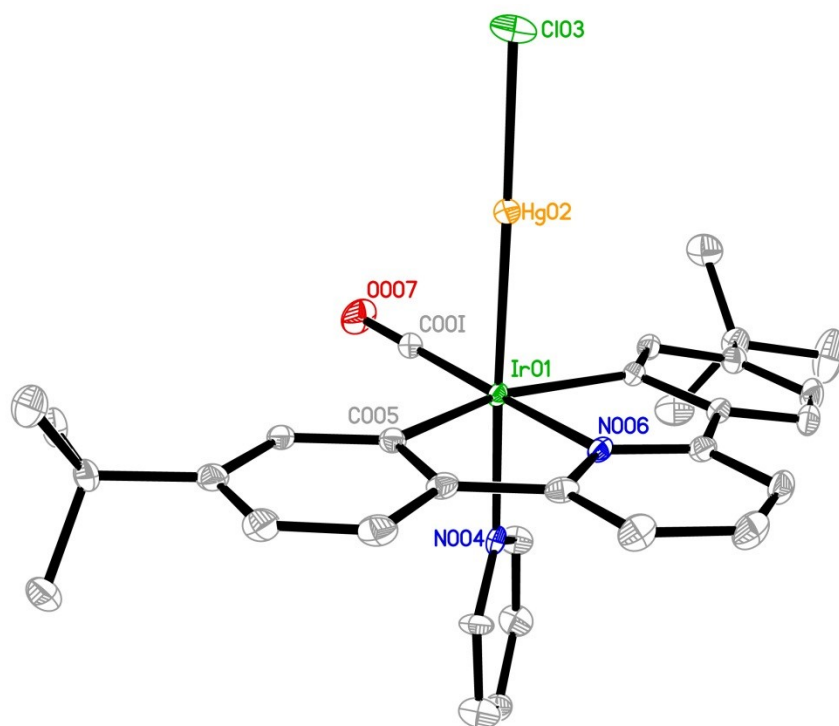

**Figure S38.** Preliminary x-ray structure of [Ir(C<sup>N</sup>C)(HgCl)(CO)(py)] (7).

**Figure S39.** Molecular structure of  $[\text{Cl}(\kappa^2\text{C},N\text{-HC}^{\wedge}\text{N}^{\wedge}\text{C})(\text{cod})\text{IrHgIr}(\text{cod})\text{Cl}_2]_2$  (**2**). The ellipsoids are drawn at 30% probability level.

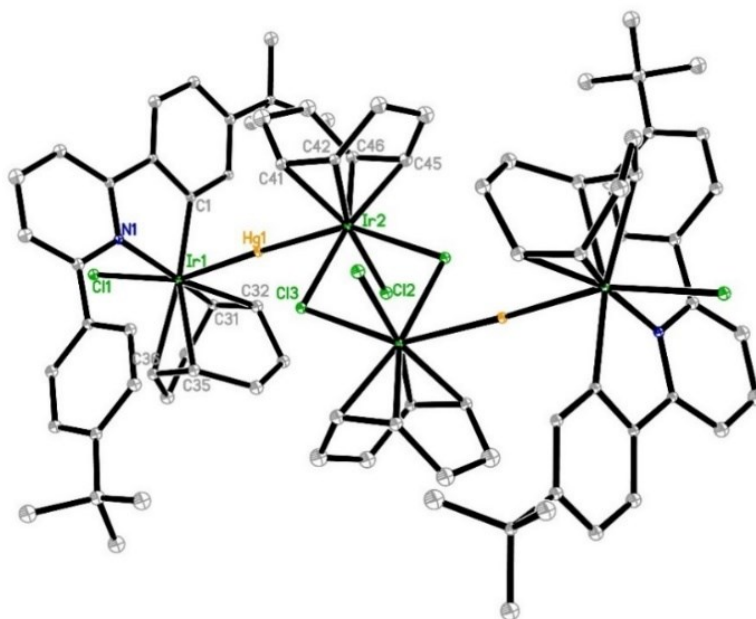

**Table S2.** Selected bond lengths and angles of  $[\text{Cl}(\kappa^2\text{C},N\text{-HC}^{\wedge}\text{N}^{\wedge}\text{C})(\text{cod})\text{IrHgIr}(\text{cod})\text{Cl}_2]_2$  (**2**).

|                          |             |             |            |
|--------------------------|-------------|-------------|------------|
| Ir1-Hg1                  | 2.5829(3)   | Ir2-Hg1     | 2.6314(3)  |
| Ir1-C1                   | 2.047(6)    | Ir1-N1      | 2.182(4)   |
| Ir1-C31                  | 2.161(6)    | Ir1-C32     | 2.207(6)   |
| Ir1-C35                  | 2.349(6)    | Ir1-C36     | 2.310(6)   |
| Ir1-Cl1                  | 2.4694(13)  | Ir2-Cl2     | 2.3950(13) |
| Ir2-Cl3                  | 2.4126(12)  | Ir2-C41     | 2.162(6)   |
| Ir2-C42                  | 2.159(5)    | Ir2-C45     | 2.127(6)   |
| Ir2-C46                  | 2.156(6)    | C31-C32     | 1.400(9)   |
| C35-C36                  | 1.374(9)    | C41-C42     | 1.399(8)   |
| C45-C46                  | 1.411(9)    |             |            |
| C1-Ir1-N1                | 79.4(2)     | C1-Ir1-Cl1  | 86.91(16)  |
| C1-Ir1-C31               | 91.7(2)     | C1-Ir1-C32  | 94.0(2)    |
| C1-Ir1-C35               | 159.8(2)    | C1-Ir1-C36  | 164.9(2)   |
| C1-Ir1-Hg1               | 79.14(15)   | N1-Ir1-Cl1  | 78.75(13)  |
| N1-Ir1-C31               | 159.2(2)    | N1-Ir1-C32  | 160.6(2)   |
| N1-Ir1-C35               | 102.65(19)  | N1-Ir1-C36  | 105.16(19) |
| N1-Ir1-Hg1               | 84.78(12)   | Cl1-Ir1-C31 | 81.99(16)  |
| Cl1-Ir1-C32              | 119.36(16)  | Cl1-Ir1-C35 | 113.27(15) |
| Cl1-Ir1-C36              | 80.07(16)   | Cl1-Ir1-Hg1 | 79.14(15)  |
| C31-Ir1-C32              | 37.4(2)     | C31-Ir1-C35 | 92.2(2)    |
| C31-Ir1-C36              | 79.0(2)     | C31-Ir1-Hg1 | 112.27(16) |
| C32-Ir1-C35              | 77.4(2)     | C32-Ir1-C36 | 85.9(2)    |
| C32-Ir1-Hg1              | 76.07(16)   | C35-Ir1-C36 | 34.3(2)    |
| C35-Ir1-Hg1              | 81.03(15)   | C36-Ir1-Hg1 | 115.31(15) |
| Ir1-Hg1-Ir2              | 176.587(11) | Cl2-Ir2-Cl3 | 91.66(5)   |
| Cl2-Ir2-Cl3 <sup>1</sup> | 85.44(4)    | Cl2-Ir2-C41 | 155.93(16) |
| Cl2-Ir2-C42              | 165.74(16)  | Cl2-Ir2-C45 | 89.64(17)  |

|                           |            |                           |            |
|---------------------------|------------|---------------------------|------------|
| Cl2-Ir2-C46               | 89.64(17)  | Cl2-Ir2-Hg1               | 76.14(3)   |
| Cl3-Ir2-Cl3 <sup>1</sup>  | 80.68(4)   | Cl3-Ir2-C41               | 88.87(17)  |
| Cl3-Ir2-C42               | 92.91(16)  | Cl3-Ir2-C45               | 164.70(17) |
| Cl3-Ir2-C46               | 156.75(17) | Cl3-Ir2-Hg1               | 78.67(3)   |
| Cl3 <sup>1</sup> -Ir2-C41 | 118.34(16) | Cl3 <sup>1</sup> -Ir2-C42 | 81.99(16)  |
| Cl3 <sup>1</sup> -Ir2-C45 | 84.23(17)  | Cl3 <sup>1</sup> -Ir2-C46 | 122.55(17) |
| Cl3 <sup>1</sup> -Ir2-Hg  | 151.75(3)  | C41-Ir2-C42               | 37.8(2)    |
| C41-Ir2-C45               | 96.1(2)    | C41-Ir2-C46               | 80.7(2)    |
| C41-Ir2-Hg1               | 80.39(16)  | C45-Ir2-C46               | 38.5(2)    |
| C45-Ir2-Hg1               | 116.39(17) | C46-Ir2-Hg1               | 79.12(17)  |

**Figure S40.** Molecular structure of [(C<sup>^N^C</sup>)(cod)IrHgIr(cod)Cl<sub>2</sub>] (**3**). The ellipsoids are drawn at 30% probability level.

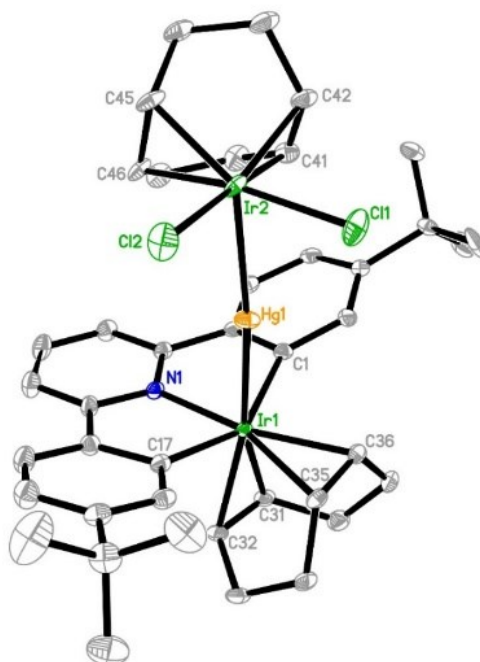

**Table S3.** Selected bond lengths and angles of [(C<sup>^N^C</sup>)(cod)IrHgIr(cod)Cl<sub>2</sub>] (**3**).

|             |            |             |            |
|-------------|------------|-------------|------------|
| Ir1-N1      | 2.045(3)   | Ir1-C1      | 2.126(4)   |
| Ir1-C17     | 2.131(4)   | Ir1-C31     | 2.211(4)   |
| Ir1-C32     | 2.187(4)   | Ir1-C35     | 2.180(4)   |
| Ir1-C36     | 2.170(4)   | Ir1-Hg1     | 2.5841(3)  |
| Ir2-Cl1     | 2.3335(12) | Ir2-Cl2     | 2.256(3)   |
| Ir2-C41     | 2.133(5)   | Ir2-C42     | 2.191(11)  |
| Ir2-C45     | 2.146(10)  | Ir2-C46     | 2.101(11)  |
| Ir2-Hg1     | 2.6656(3)  | C31-C32     | 1.426(6)   |
| C35-C36     | 1.417(7)   | C41-C42     | 1.294(11)  |
| C45-C46     | 1.422(15)  |             |            |
| N1-Ir1-C1   | 77.30(15)  | N1-Ir1-C17  | 77.99(15)  |
| N1-Ir1-C31  | 92.65(15)  | N1-Ir1-C32  | 88.86(15)  |
| N1-Ir1-C35  | 160.94(16) | N1-Ir1-C36  | 160.32(17) |
| N1-Ir1-Hg1  | 90.67(10)  | C1-Ir1-C17  | 148.08(16) |
| C1-Ir1-C31  | 83.44(16)  | C1-Ir1-C32  | 119.22(16) |
| C1-Ir1-C35  | 121.70(17) | C1-Ir1-C36  | 83.89(17)  |
| C1-Ir1-Hg1  | 81.20(11)  | C17-Ir1-C31 | 117.65(16) |
| C17-Ir1-C32 | 80.04(16)  | C17-Ir1-C35 | 84.61(17)  |
| C17-Ir1-C36 | 121.66(17) | C17-Ir1-Hg1 | 79.19(11)  |
| C31-Ir1-C32 | 37.84(16)  | C31-Ir1-C35 | 88.54(18)  |
| C31-Ir1-C36 | 79.34(18)  | C31-Ir1-Hg1 | 163.16(11) |
| C32-Ir1-C35 | 80.45(17)  | C32-Ir1-C36 | 95.36(17)  |
| C32-Ir1-Hg1 | 158.85(12) | C35-Ir1-C36 | 38.03(17)  |
| C35-Ir1-Hg1 | 93.67(13)  | C36-Ir1-Hg1 | 92.16(13)  |
| Ir1-Hg1-Ir2 | 169.439(9) | Cl1-Ir2-Cl2 | 93.44(10)  |

|             |           |             |            |
|-------------|-----------|-------------|------------|
| Cl1-Ir2-C41 | 91.67(14) | Cl1-Ir2-C42 | 84.1(3)    |
| Cl1-Ir2-C45 | 153.1(3)  | Cl1-Ir2-C46 | 165.9(3)   |
| Cl1-Ir2-Hg1 | 79.68(4)  | Cl2-Ir2-C41 | 168.61(17) |
| Cl2-Ir2-C42 | 156.1(3)  | Cl2-Ir2-C45 | 93.7(3)    |
| Cl2-Ir2-C46 | 91.6(3)   | Cl2-Ir2-Hg1 | 89.05(12)  |
| C41-Ir2-C42 | 34.8(3)   | C41-Ir2-C45 | 86.3(3)    |
| C41-Ir2-C46 | 81.1(3)   | C41-Ir2-Hg1 | 81.85(12)  |
| C42-Ir2-C45 | 79.0(4)   | C42-Ir2-C46 | 96.5(4)    |
| C42-Ir2-Hg1 | 113.7(3)  | C45-Ir2-C46 | 39.1(4)    |
| C45-Ir2-Hg1 | 126.3(3)  | C46-Ir2-Hg1 | 87.3(3)    |

**Figure S41.** Molecular structure of [Ir(C<sup>^</sup>N<sup>^</sup>C)(cod)(HgCl)] (**4**). The ellipsoids are drawn at 30% probability level.

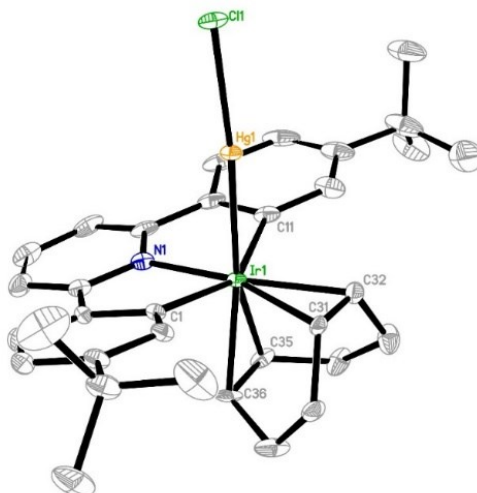

**Table S4.** Selected bond lengths and angles of [Ir(C<sup>^</sup>N<sup>^</sup>C)(cod)(HgCl)] (**4**).

|             |            |             |            |
|-------------|------------|-------------|------------|
| Ir1-N1      | 2.040(5)   | Ir1-C1      | 2.147(6)   |
| Ir1-C11     | 2.148(6)   | Ir1-C31     | 2.180(6)   |
| Ir1-C32     | 2.194(6)   | Ir1-C35     | 2.202(6)   |
| Ir1-C36     | 2.216(6)   | Ir1-Hg1     | 2.5705(3)  |
| Hg1-Cl1     | 2.4255(13) | C31-C32     | 1.398(9)   |
| C35-C36     | 1.395(9)   |             |            |
| N1-Ir1-C1   | 77.2(2)    | N1-Ir1-C11  | 78.1(2)    |
| N1-Ir1-C31  | 159.9(2)   | N1-Ir1-C32  | 161.7(2)   |
| N1-Ir1-C35  | 90.2(2)    | N1-Ir1-C36  | 90.7(2)    |
| N1-Ir1-Hg1  | 91.68(13)  | C1-Ir1-C11  | 150.3(2)   |
| C1-Ir1-C31  | 83.7(2)    | C1-Ir1-C32  | 120.8(2)   |
| C1-Ir1-C35  | 117.0(2)   | C1-Ir1-C36  | 81.2(2)    |
| C1-Ir1-Hg1  | 82.71(14)  | C11-Ir1-C31 | 122.0(3)   |
| C11-Ir1-C32 | 85.2(3)    | C11-Ir1-C35 | 79.3(2)    |
| C11-Ir1-C36 | 115.4(2)   | C11-Ir1-Hg1 | 81.74(17)  |
| C31-Ir1-C32 | 37.3(2)    | C31-Ir1-C35 | 92.6(2)    |
| C31-Ir1-C36 | 79.8(2)    | C31-Ir1-Hg1 | 92.35(15)  |
| C32-Ir1-C35 | 79.2(2)    | C32-Ir1-C36 | 89.6(3)    |
| C32-Ir1-Hg1 | 93.33(17)  | C35-Ir1-C35 | 36.8(2)    |
| C35-Ir1-Hg1 | 160.14(18) | C36-Ir1-Hg1 | 162.79(18) |
| Ir1-Hg1-Cl1 | 171.64(4)  |             |            |

**Figure S42.** Molecular structure of  $[\text{Ir}(\text{C}^{\wedge}\text{N}^{\wedge}\text{C})(\text{cod})\text{Cl}]$  (**5**). The ellipsoids are drawn at 30% probability level.

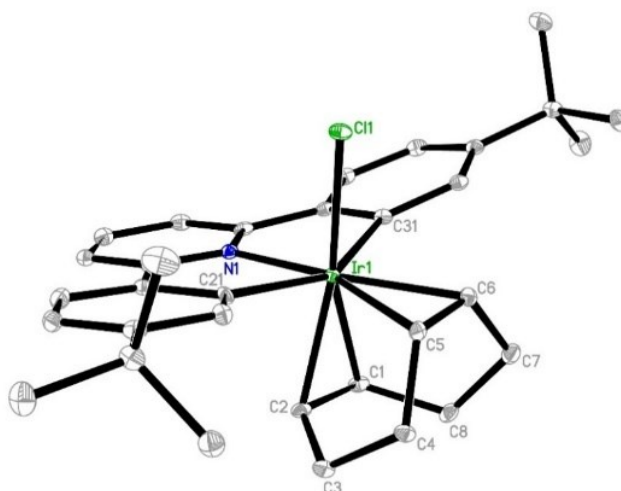

**Table S5.** Selected bond lengths and angles of  $[\text{Ir}(\text{C}^{\wedge}\text{N}^{\wedge}\text{C})(\text{cod})\text{Cl}]$  (**5**).

|             |            |             |            |
|-------------|------------|-------------|------------|
| Ir1-N1      | 2.052(2)   | Ir1-C21     | 2.140(3)   |
| Ir1-C31     | 2.139(3)   | Ir1-C1      | 2.177(3)   |
| Ir1-C2      | 2.168(3)   | Ir1-C5      | 2.178(3)   |
| Ir1-C6      | 2.181(3)   | Ir1-Cl1     | 2.3993(6)  |
| C1-C2       | 1.402(4)   | C5-C6       | 1.405(4)   |
| N1-Ir1-C21  | 77.92(10)  | N1-Ir1-C31  | 77.45(10)  |
| N1-Ir1-C1   | 90.01(10)  | N1-Ir1-C2   | 87.10(10)  |
| N1-Ir1-C5   | 160.61(10) | N1-Ir1-C6   | 160.15(10) |
| N1-Ir1-Cl1  | 96.06(6)   | C21-Ir1-C31 | 151.35(10) |
| C21-Ir1-C1  | 113.74(10) | C21-Ir1-C2  | 76.45(10)  |
| C21-Ir1-C5  | 84.68(10)  | C21-Ir1-C6  | 121.81(11) |
| C21-Ir1-Cl1 | 83.26(7)   | C31-Ir1-C1  | 80.68(10)  |
| C31-Ir1-C2  | 116.53(10) | C31-Ir1-C5  | 121.47(10) |
| C31-Ir1-C6  | 83.92(11)  | C31-Ir1-Cl1 | 85.01(7)   |
| C1-Ir1-C2   | 37.65(11)  | C1-Ir1-C5   | 89.20(10)  |
| C1-Ir1-C6   | 80.18(11)  | C1-Ir1-Cl1  | 162.86(8)  |
| C2-Ir1-C5   | 80.49(10)  | C2-Ir1-C6   | 95.25(10)  |
| C2-Ir1-Cl1  | 158.34(8)  | C5-Ir1-C6   | 37.61(10)  |
| C5-Ir1-Cl1  | 90.27(7)   | C6-Ir1-Cl1  | 89.01(8)   |



**Figure S43.** Molecular structure of  $[\text{Ir}(\text{C}^{\wedge}\text{N}^{\wedge}\text{C})(\kappa^2\text{C},\text{N}\text{-HC}^{\wedge}\text{N}^{\wedge}\text{C})(\text{CO})]$  (**8**). The ellipsoids are drawn at 30% probability level.

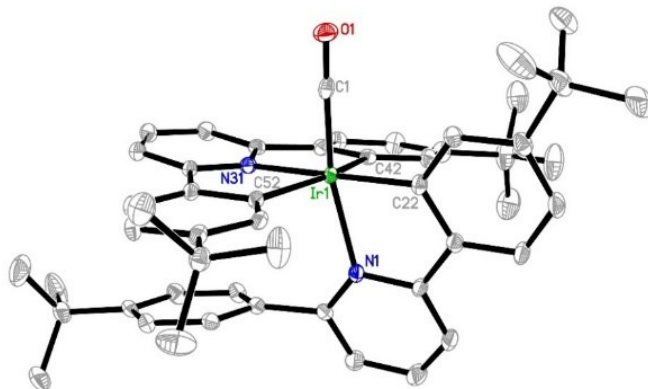

**Table S6.** Selected bond lengths and angles of  $[\text{Ir}(\text{C}^{\wedge}\text{N}^{\wedge}\text{C})(\kappa^2\text{C},\text{N}\text{-HC}^{\wedge}\text{N}^{\wedge}\text{C})(\text{CO})]$  (**8**).

|             |            |             |            |
|-------------|------------|-------------|------------|
| Ir1-N1      | 2.163(2)   | Ir1-N31     | 2.083(2)   |
| Ir1-C1      | 1.821(3)   | Ir1-C22     | 2.028(3)   |
| Ir1-C42     | 2.101(3)   | Ir1-C52     | 2.113(3)   |
| C1-O1       | 1.153(3)   |             |            |
| N1-Ir1-N31  | 99.57(8)   | N1-Ir1-C1   | 168.35(10) |
| N1-Ir1-C22  | 79.57(10)  | N1-Ir1-C42  | 81.98(9)   |
| N1-Ir1-C52  | 97.15(9)   | N31-Ir1-C1  | 91.02(10)  |
| N31-Ir1-C22 | 176.42(10) | N31-Ir1-C42 | 78.94(10)  |
| N31-Ir1-C52 | 79.14(9)   | C1-Ir1-C22  | 89.56(11)  |
| C1-Ir1-C42  | 95.41(11)  | C1-Ir1-C52  | 89.57(11)  |
| C22-Ir1-C42 | 97.49(10)  | C22-Ir1-C52 | 104.40(10) |
| C42-Ir1-C52 | 157.59(10) | Ir1-C1-O1   | 176.8(2)   |

**Figure S44.** Molecular structure of the isomer **8'**. The ellipsoids are drawn at 30% probability level.

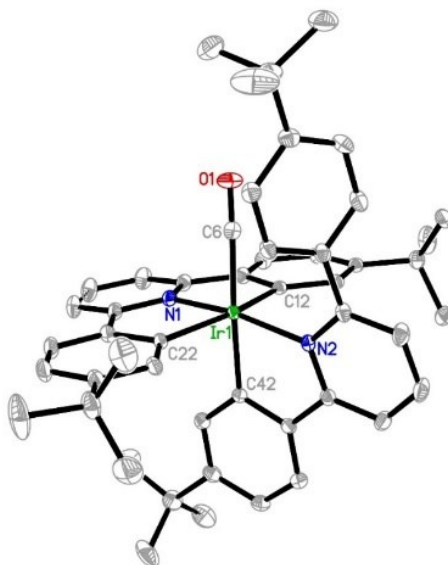

**Table S7.** Selected bond lengths and angles of the isomer **8'**.

|             |            |             |            |
|-------------|------------|-------------|------------|
| Ir1-N1      | 2.0122(17) | Ir1-N2      | 2.0998(16) |
| Ir1-C6      | 1.933(2)   | Ir1-C12     | 2.096(2)   |
| Ir1-C22     | 2.114(2)   | Ir1-C42     | 2.060(2)   |
| C6-O1       | 1.135(3)   |             |            |
| N1-Ir1-N2   | 168.31(7)  | N1-Ir1-C6   | 90.16(8)   |
| N1-Ir1-C12  | 80.17(8)   | N1-Ir1-C22  | 80.02(8)   |
| N1-Ir1-C42  | 89.19(8)   | N2-Ir1-C6   | 100.56(8)  |
| N2-Ir1-C12  | 95.48(7)   | N2-Ir1-C22  | 103.07(7)  |
| N2-Ir1-C42  | 79.73(7)   | C6-Ir1-C12  | 87.71(8)   |
| C6-Ir1-C22  | 96.91(8)   | C6-Ir1-C42  | 174.97(8)  |
| C12-Ir1-C22 | 159.66(8)  | C12-Ir1-C42 | 87.27(8)   |
| C22-Ir1-C42 | 87.89(8)   | Ir1-C6-O1   | 170.77(19) |

**Figure S45.** Molecular structure of  $[\text{Ir}(\kappa^2\text{C},\text{N-HC}^{\wedge}\text{N}^{\wedge}\text{C})_2(\text{OTs})(\text{CO})]$  (**9**). The ellipsoids are drawn at 30% probability level.

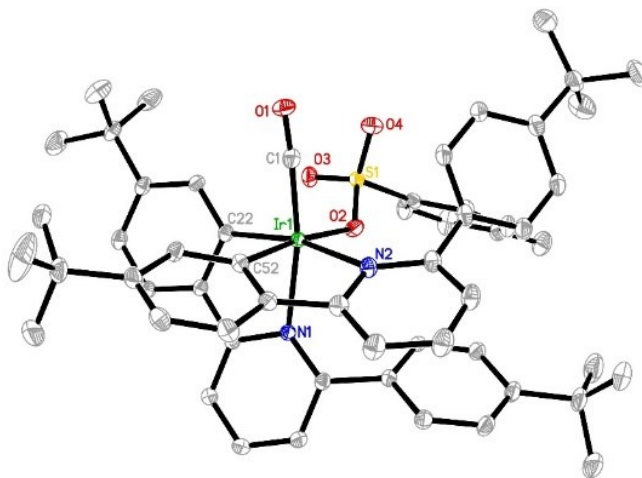

**Table S8.** Selected bond lengths and angles of  $[\text{Ir}(\kappa^2\text{C},\text{N-HC}^{\wedge}\text{N}^{\wedge}\text{C})_2(\text{OTs})(\text{CO})]$  (**9**).

|             |           |            |            |
|-------------|-----------|------------|------------|
| Ir1-N1      | 2.172(2)  | Ir1-N2     | 2.274(2)   |
| Ir1-C1      | 1.844(3)  | Ir1-C22    | 2.032(3)   |
| Ir1-C52     | 2.022(3)  | Ir1-O2     | 2.1914(19) |
| C1-O1       | 1.138(4)  |            |            |
| N1-Ir1-N2   | 90.59(8)  | N1-Ir1-C1  | 169.77(10) |
| N1-Ir1-C22  | 80.35(9)  | N1-Ir1-C52 | 84.62(9)   |
| N1-Ir1-O2   | 88.17(8)  | N2-Ir1-C1  | 96.44(10)  |
| N2-Ir1-C22  | 164.67(9) | N2-Ir1-C52 | 78.28(10)  |
| N2-Ir1-O2   | 101.50(8) | C1-Ir1-C22 | 91.14(11)  |
| C1-Ir1-C52  | 89.52(12) | C1-Ir1-O2  | 97.67(10)  |
| C22-Ir1-C52 | 88.51(10) | C22-Ir1-O2 | 90.63(9)   |
| C52-Ir1-O2  | 172.78(9) |            |            |

**Figure S46.** Molecular structure of  $[\text{Ir}(\text{PPh}_3)(\kappa^2\text{P},\text{C}-\text{C}_6\text{H}_4\text{PPh}_2)_2\text{Cl}]$  (**10**). The ellipsoids are drawn at 30% probability level.

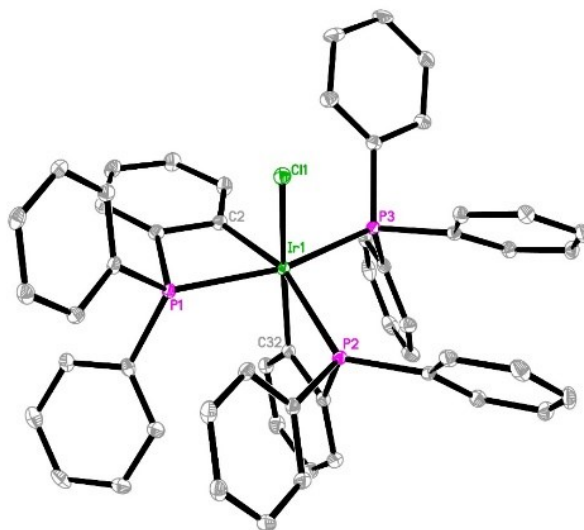

**Table S9.** Selected bond lengths and angles of  $[\text{Ir}(\text{PPh}_3)(\kappa^2\text{P},\text{C}-\text{C}_6\text{H}_4\text{PPh}_2)_2\text{Cl}]$  (**10**).

|            |           |             |            |
|------------|-----------|-------------|------------|
| Ir1-Cl1    | 2.4921(8) | Ir1-C2      | 2.079(3)   |
| Ir1-C32    | 2.044(4)  | Ir1-P1      | 2.3935(8)  |
| Ir1-P2     | 2.3937(8) | Ir1-P3      | 2.3300(8)  |
| Cl1-Ir1-C2 | 95.18(10) | Cl1-Ir1-C32 | 167.47(10) |
| Cl1-Ir1-P1 | 87.73(3)  | Cl1-Ir1-P2  | 100.01(3)  |
| Cl1-Ir1-P3 | 94.51(3)  | C2-Ir1-C32  | 95.77(13)  |
| C2-Ir1-P1  | 67.28(9)  | C2-Ir1-P2   | 160.24(10) |
| C2-Ir1-P3  | 93.58(9)  | C32-Ir1-P1  | 90.88(9)   |
| C32-Ir1-P2 | 68.01(10) | C32-Ir1-P3  | 90.88(9)   |
| P1-Ir1-P2  | 100.61(3) | P1-Ir1-P3   | 160.86(3)  |
| P2-Ir1-P3  | 97.72(3)  |             |            |

cwm, MW=940  
leu210326\_1 22 (0.217)

1: TOF MS ES+  
1.74e7

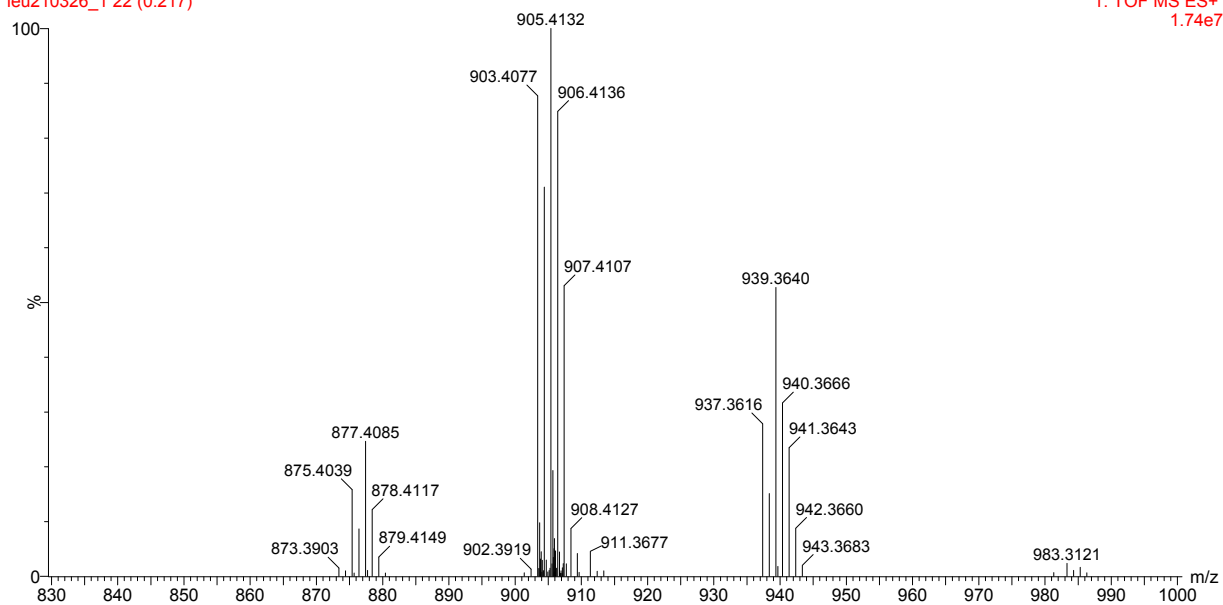

**Figure S47.** Mass spectrum (ESI) of the product of oxidation of **8** by (4-BrC<sub>6</sub>H<sub>4</sub>)<sub>3</sub>NSbCl<sub>6</sub>.
